# A chromatic feature detector in the retina signals visual context changes

Larissa Höfling<sup>1,2</sup>, Klaudia P. Szatko<sup>1,2,9</sup>, Christian Behrens<sup>1</sup>, Yuyao Deng<sup>1,2</sup>, Yongrong Qiu<sup>1,2</sup>, David A. Klindt<sup>8</sup>, Zachary Jessen<sup>5</sup>, Gregory W. Schwartz<sup>5</sup>, Matthias Bethge<sup>2,3</sup>, Philipp Berens<sup>1,2,3,4</sup>, Katrin Franke<sup>1,10</sup>, Alexander S. Ecker<sup>6,7</sup>, and Thomas Euler<sup>1,2,✉</sup>

<sup>1</sup>Institute for Ophthalmic Research, University of Tübingen, Tübingen, Germany

<sup>2</sup>Centre for Integrative Neuroscience, University of Tübingen, Tübingen, Germany

<sup>3</sup>Tübingen AI Center, University of Tübingen, Tübingen, Germany

<sup>4</sup>Hertie Institute for AI in Brain Health, Tübingen, Germany

<sup>5</sup>Feinberg School of Medicine, Department of Ophthalmology, Northwestern University, Chicago, IL, USA

<sup>6</sup>Institute of Computer Science and Campus Institute Data Science, University of Göttingen, Göttingen, Germany

<sup>7</sup>Max Planck Institute for Dynamics and Self-Organization, Göttingen, Germany

<sup>8</sup>SLAC National Accelerator Laboratory, Stanford University, Menlo Park, CA, USA

<sup>9</sup>Current affiliation: National Institute of Neurological Disorders and Stroke, National Institutes of Health, Bethesda, MD, USA

<sup>10</sup>Current affiliation: Department of Neuroscience, Baylor College of Medicine, Houston, TX, USA

**The retina transforms patterns of light into visual feature representations supporting behaviour. These representations are distributed across various types of retinal ganglion cells (RGCs), whose spatial and temporal tuning properties have been studied extensively in many model organisms, including the mouse. However, it has been difficult to link the potentially nonlinear retinal transformations of natural visual inputs to specific ethological purposes. Here, we discover a nonlinear selectivity to chromatic contrast in an RGC type that allows the detection of changes in visual context. We trained a convolutional neural network (CNN) model on large-scale functional recordings of RGC responses to natural mouse movies, and then used this model to search *in silico* for stimuli that maximally excite distinct types of RGCs. This procedure predicted centre colour-opponency in transient Suppressed-by-Contrast RGCs (tSbC), a cell type whose function is being debated. We confirmed experimentally that these cells indeed responded very selectively to Green-OFF, UV-ON contrasts. This type of chromatic contrast was characteristic of transitions from ground to sky in the visual scene, as might be elicited by head- or eye-movements across the horizon. Because tSbC cells performed best among all RGC types at reliably detecting these transitions, we suggest a role for this RGC type in providing contextual information (i.e. sky or ground) necessary for the selection of appropriate behavioural responses to other stimuli, such as looming objects. Our work showcases how a combination of experiments with natural stimuli and computational modelling allows discovering novel types of stimulus selectivity and identifying their potential ethological relevance.**

retina | colour vision | computational modelling | digital twin | early visual pathway | natural stimuli

Correspondence: [thomas.euler@cin.uni-tuebingen.de](mailto:thomas.euler@cin.uni-tuebingen.de)

## Introduction

Sensory systems evolved to generate representations of an animal's natural environment useful for survival and procreation (1). These environments are complex and high-dimensional, and different features are relevant for different species (reviewed in (2)). As a consequence, the representations are adapted to an animal's needs: features of the world relevant for the animal are represented with enhanced preci-

sion, whereas less important features are discarded. Sensory processing is thus best understood within the context of the environment an animal evolved in and that it interacts with (reviewed in (3, 4)).

The visual system is well-suited for studying sensory processing, as the first features are already extracted at its experimentally well-accessible front-end, the retina (reviewed in (2, 7)). In the mouse, this tissue gives rise to around 40 parallel channels that detect different features (6, 8–10), represented by different types of retinal ganglion cells (RGCs), whose axons send information to numerous visual centres in the brain (11). Some of these channels encode basic features, such as luminance changes and motion, that are only combined in downstream areas to support a range of behaviours such as cricket hunting in mice (12). Other channels directly extract specific features from natural scenes necessary for specific behaviours. For instance, transient OFF- $\alpha$  cells trigger freezing or escape behaviour in response to looming stimuli (13–15).

For many RGC types, however, we lack understanding of the features they encode and how these link to behaviour (16). One reason for this is that the synthetic stimuli commonly used to study retinal processing fail to drive retinal circuits “properly” and, hence, cannot uncover critical response properties triggered in natural environments. Colour, for example, is a salient feature in nature, and the mouse visual system dedicates intricate circuitry to the processing of chromatic information (17–22). Studies using synthetic stimuli have revealed nonlinear and centre-surround interactions between colour channels, but it is not clear how these are engaged in retinal processing of natural environments.

Indeed, stimuli capturing the statistics of natural environments have revealed a larger complexity in retinal spatial nonlinearities than had been previously described based on simpler synthetic stimuli (23). Such nonlinearities, crucial for the encoding of natural stimuli, cannot be captured by Linear-Nonlinear (LN) models of retinal processing, and several improvements over LN models have been proposed for the identification of receptive fields (RF) (reviewed in

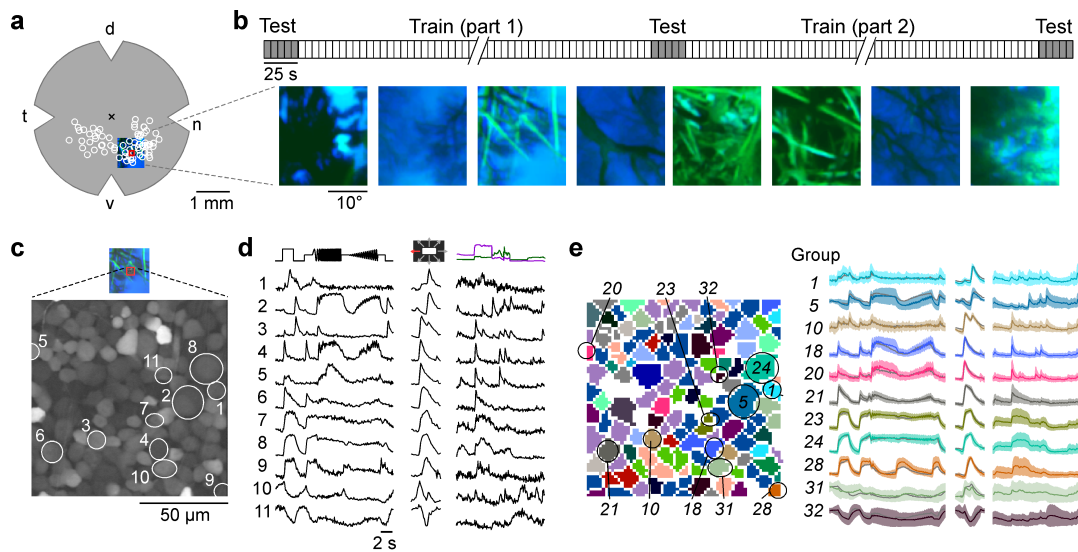

**Figure 1. Mouse RGCs display diverse responses to a natural movie stimulus** (a) Illustration of a flat-mounted retina, with recording fields (white circles) and stimulus area centred on the red recording field indicated (cross marks optic disc; d, dorsal; v, ventral; t, temporal; n, nasal). (b) Natural movie stimulus structure (top) and example frames (bottom). The stimulus consisted of 5-s clips taken from UV-green footage recorded outside (5), with 3 repeats of a 5-clip test sequence (highlighted in grey) and a 108-clip training sequence (see Methods). (c) Representative recording field (bottom; marked by red square in (a)) showing somata of ganglion cell layer (GCL) cells loaded with  $\text{Ca}^{2+}$  indicator OGB-1. (d)  $\text{Ca}^{2+}$  responses of exemplary RGCs (indicated by circles in (c)) to chirp (left), moving bar (centre), and natural movie (right) stimulus. (e) Same recording field as in (c) but with cells colour-coded by functional RGC group (left; see Methods and (6)) and group responses (coloured, mean  $\pm$  SD across cells; trace of example cells in (d) overlaid in black).

(24)). In recent years, convolutional neural network (CNN) models have become the state-of-the-art approach for predictive modelling of visual processing, both in the retina (25–28), as well as in higher visual areas (29–31). In the cortex, two recent studies took the CNN modelling approach further, beyond response prediction, by probing the networks for stimuli that would maximally excite the modelled neurons (32, 33). The resulting *maximally exciting inputs* (MEIs) were more complex and diverse than expected based on previous results obtained with synthetic stimuli and linear methods. Leveraging the power of this approach, another study highlighted the ethological relevance of colour by uncovering a state-dependent shift in chromatic preference of mouse V1 neurons, a shift that could facilitate the detection of aerial predators against a UV-bright sky (34).

Here, we combined the power of CNN-based modelling with large-scale recordings from RGCs to investigate colour processing in the mouse retina under natural stimulus conditions. Since mouse photoreceptors are sensitive to green and UV light (35), we recorded RGC responses to stimuli capturing the chromatic composition of natural mouse environments in these two chromatic channels. A model-guided search for MEIs in chromatic stimulus space predicted a novel type of chromatic tuning in transient Suppressed-by-Contrast (tSbC) RGCs, a type whose function is being debated (36–38).

A detailed *in-silico* characterisation followed up by experimental validation *ex-vivo* confirmed this cell type’s pronounced and unique selectivity for dynamic full-field changes from green-dominated to UV-dominated scenes, a type of visual input that matches the scene statistics of transitions across the horizon (5, 39, 40). We therefore suggest a role for tSbC RGCs in detecting behaviourally relevant

changes in visual context, such as a transitions from ground (i.e. below the horizon) to sky (i.e. above the horizon).

## Results

Here, we investigated colour processing in the mouse retina under natural stimulus conditions. To this end, we trained a CNN model on RGC responses to a movie covering both achromatic and chromatic contrasts occurring naturally in the mouse environment, and then performed a model-guided search for stimuli that maximise the responses of RGCs.

**Mouse RGCs display diverse responses to a natural movie stimulus.** Using two-photon population  $\text{Ca}^{2+}$  imaging, we recorded responses from 8,388 cells (in 72 recording fields across 32 retinæ) in the ganglion cell layer (GCL) of the isolated mouse retina (Figure 1a) to a range of visual stimuli. Since complex interactions between colour channels have been mostly reported in the ventral retina and opsin-transitional zone, we focused our recordings on these regions (20, 21).

The stimuli included two achromatic synthetic stimuli – a contrast and frequency modulation (“chirp” stimulus) and a bright-on-dark bar moving in eight directions (“moving bar”, MB) – to identify the functional cell type (see below), as well as a dichromatic natural movie (Figure 1b-d). The latter was composed of footage recorded outside in the field using a camera that captured the spectral bands (UV and green; (5)) to which mouse photoreceptors are sensitive ( $\lambda_{peak}^S = 360$ ,  $\lambda_{peak}^M = 510$  nm for S- and M-cones, respectively (35)). We used 113 different movie clips, each lasting 5 s, that were displayed in pseudo-random order. Five of these constituted the test set and were repeated three times: at the beginning, in the middle and at the end of the movie

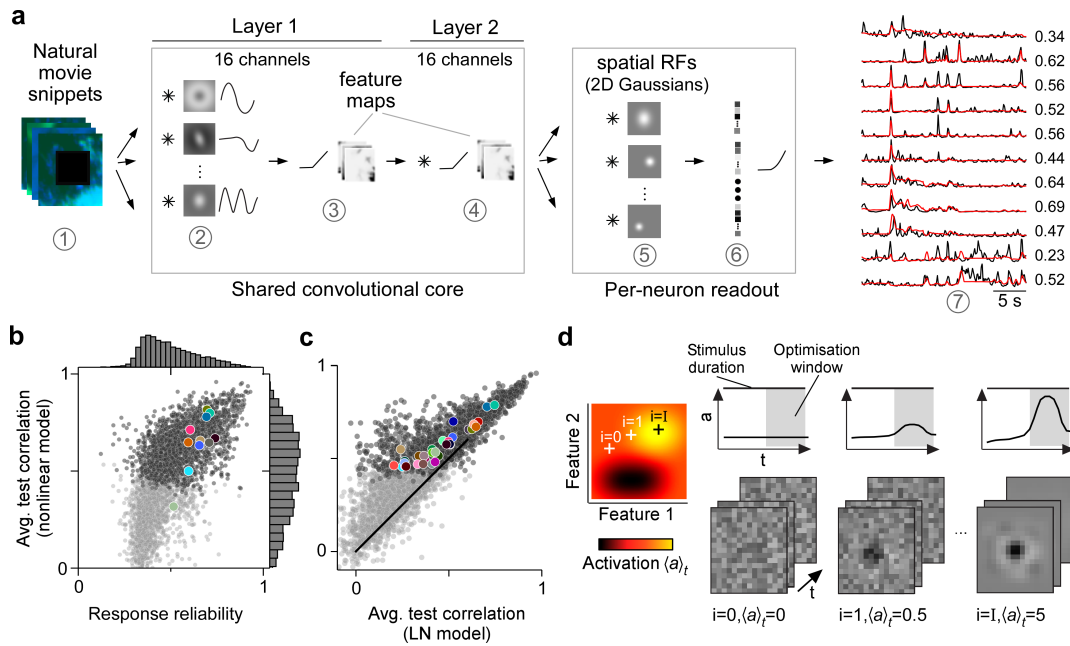

**Figure 2. CNN model captures diverse tuning of RGC groups and predicts MEIs** (a) Illustration of the CNN model and its output. The model takes natural movie clips as input (1), performs convolutions with 3D space-time separable filters (2) followed by a nonlinear activation function (3) in two consecutive layers (2-4) within its core, and feeds the output of its core into a per-neuron readout. For each RGC, the readout convolves the feature maps with a learned RF modelled as a 2D Gaussian (5), and finally feeds a weighted sum of the resulting vector through a softplus nonlinearity (6) to yield the firing rate prediction for that RGC (7). Numbers indicate averaged single-trial test set correlation between predicted (red) and recorded (black) responses. (b) Test set correlation between model prediction and neural response (averaged across three repetitions) as a function of response reliability (see Methods) for  $N=3,527$  RGCs. Coloured dots correspond to example cells shown in Figure 1c-e. Dots in darker grey correspond to the  $N=1,947$  RGCs that passed the model test correlation and movie response quality criterion (see Methods and Figure 1-figure supplement 1c). (c) Test set correlation (as in (b)) of model vs. test set correlation of a linearised version of the CNN model (for details, see Methods). Coloured dots correspond to RGC groups 1-32 (6). Dark and light grey dots as in (b). (d) Illustration of model-guided search for maximally exciting inputs (MEIs). The trained model captures neural tuning to stimulus features (far left; heat map illustrates “landscape” of neural tuning to stimulus features). Starting from a randomly initialised input (2nd from left; a 3D tensor in space and time; only one colour channel illustrated here), the model follows the gradient along the tuning surface (far left) to iteratively update the input until it arrives at the stimulus (bottom right) that maximises the model neuron’s activation within an optimisation time window (0.66 s, grey box, top right).

144 presentation, thereby allowing to assess the reliability of  
145 neuronal responses across the recording (Figure 1b, top).

146 The responses elicited by the synthetic stimuli and the  
147 natural movie were diverse, displaying ON (Figure 1d, rows  
148 4-9), ON-OFF (row 3) and OFF (rows 1 and 2), as well  
149 as sustained and transient characteristics (e.g., rows 8 and  
150 4, respectively). Some responses were suppressed by tempo-  
151 ral contrast (generally, rows 10, 11; at high contrast and  
152 frequency, row 9). A total of 6,984 GCL cells passed our  
153 response quality criteria (see Methods); 3,527 cells could  
154 be assigned to one of 32 previously characterised functional  
155 RGC groups (6) based on their responses to the chirp and  
156 moving bar stimuli using our recently developed classifier  
157 (Figure 1e; Figure 1-figure supplement 1Ia) (5). Cells as-  
158 signed to any of groups 33-46 were considered displaced  
159 amacrine cells and were not analysed in this study (for de-  
160 tailed filtering pipeline, see Figure 1-figure supplement 1Ic).

161 **CNN model captures diverse tuning of RGC groups  
162 and predicts MEIs.** We trained a CNN model on the  
163 RGCs’ movie responses (Figure 2a) and evaluated model  
164 performance as the correlation between predicted and trial-  
165 averaged measured test responses,  $C(\hat{r}^{(n)}, \langle r^{(n)} \rangle_i)$  (Fig-  
166 ure 2b). This metric can be interpreted as an estimate  
167 of the achieved fraction of the maximally achievable cor-  
168 relation (see Methods). The mean correlation per RGC  
169 group ranged from 0.32 ( $G_{14}$ ) to 0.79 ( $G_{24}$ ) (Figure 1-figure

170 supplement 1Ib) and reached an average of 0.48 (for all  
171  $N=3,527$  cells passing filtering steps 1-3, Figure 1-figure  
172 supplement 1Ic). We also tested the performance of our  
173 nonlinear model against a linearised version (see Methods;  
174 equivalent to a Linear-Nonlinear (LN) model, and from here  
175 on “LN model”) and found that the nonlinear CNN model  
176 achieved a higher test set correlation for all RGC groups  
177 (average correlation LN model: 0.38;  $G_{14}$ : 0.2,  $G_{24}$ : 0.65,  
178 Figure 2c).

179 Next, we wanted to leverage our nonlinear CNN model  
180 to search for potentially nonlinear stimulus selectivities of  
181 mouse RGC groups. Towards this goal, we aimed to iden-  
182 tify stimuli that optimally drive RGCs of different groups.  
183 For linear systems, the optimal stimulus is equivalent to the  
184 linear filter and can be identified with classical approaches  
185 such as reverse correlation (41). However, since both the  
186 RGCs and the CNN model were nonlinear, a different ap-  
187 proach was necessary. Other recent modelling studies in  
188 the visual system have leveraged CNN models to predict  
189 static maximally exciting inputs (MEIs) for neurons in mon-  
190 key V4 (33, 42) and mouse V1 (32, 34). We adopted this  
191 approach to predict dynamic (i.e., time-varying) MEIs for  
192 mouse RGCs. We used gradient ascent on a randomly ini-  
193 tialised, contrast- and range-constrained input to find the  
194 stimulus that maximised the mean activation of a given  
195 model neuron within a short time window (0.66 s; see Meth-  
196 ods; Figure 2d).

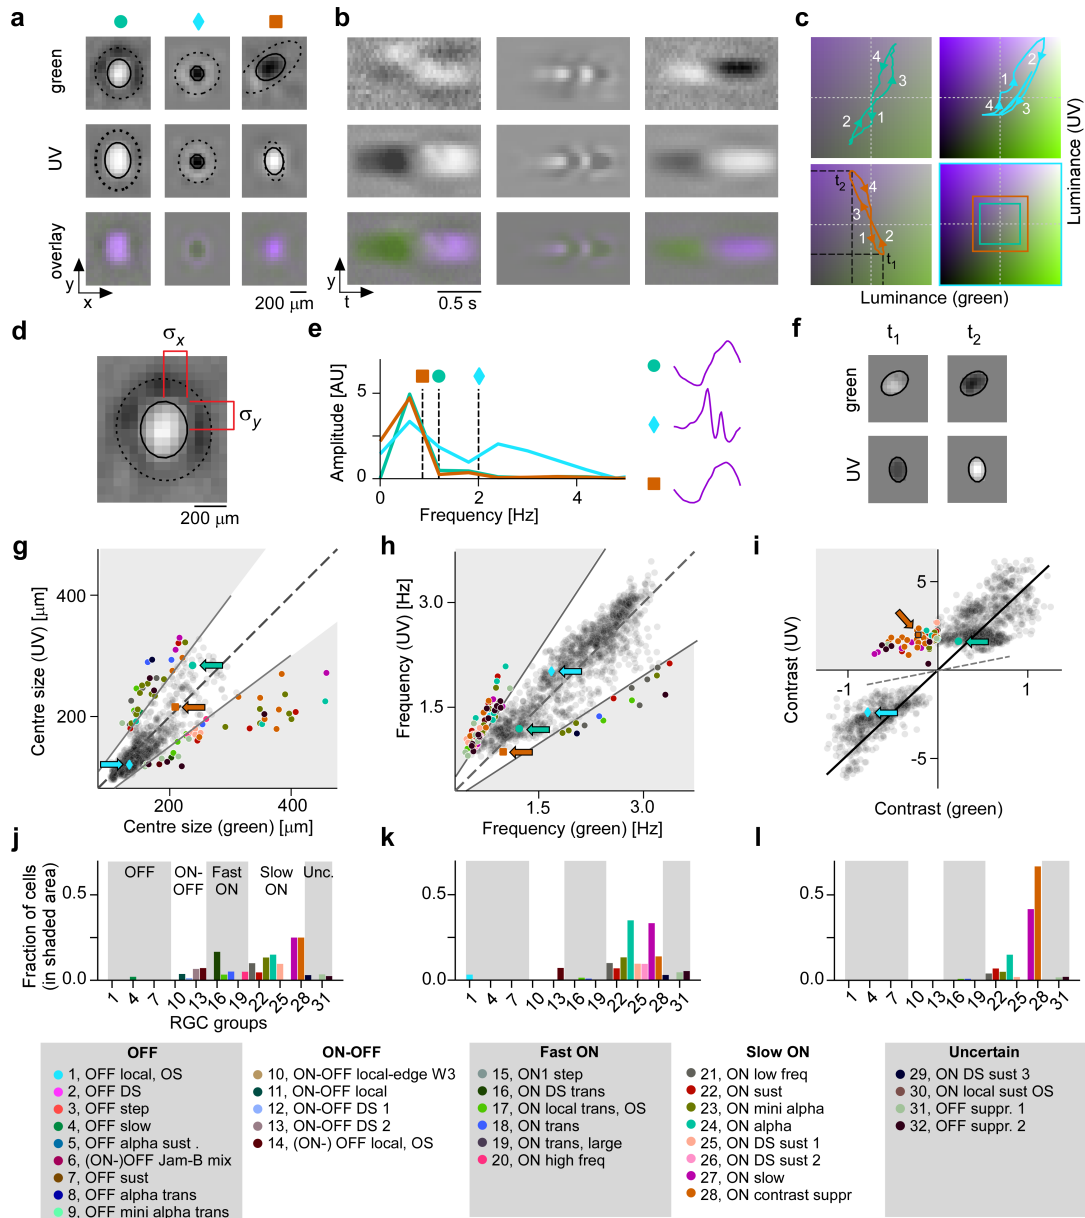

**Figure 3. Spatial, temporal and chromatic properties of MEIs differ between RGC groups** (a) Spatial component of three example MEIs for green (top), UV (middle) and overlay (bottom). Solid and dashed circles indicate MEI centre and surround fit, respectively. For display, spatial components  $s$  in the two channels were re-scaled to a similar range and displayed on a common grey-scale map ranging from black for  $-\max(|s|)$  to white for  $\max(|s|)$ , i.e. symmetric about 0 (grey). (b) Spatio-temporal (y-t) plot for the three example MEIs (from (a)) at a central vertical slice for green (top), UV (middle) and overlay (bottom). Grey-scale map analogous to (a). (c) Trajectories through colour space over time for the centre of the three MEIs. Trajectories start at the origin (grey level); direction of progress indicated by arrow heads. Bottom right: Bounding boxes of the respective trajectory plots. (d) Calculation of MEI centre size, defined as  $\sigma_x + \sigma_y$ , with  $\sigma_x$  and  $\sigma_y$  the s.d. in horizontal and vertical direction, respectively, of the DoG fit to the MEI. (e) Calculation of MEI temporal frequency: Temporal components are transformed using Fast Fourier Transform, and MEI frequency is defined as the amplitude-weighted average frequency of the Fourier-transformed temporal component. (f) Calculation of centre contrast, which is defined as the difference in intensity at the last two peaks (indicated by  $t_1$  and  $t_2$ , respectively, in (c)). For the example cell (orange markers and lines), green intensity decreases, resulting in OFF contrast, and UV intensity increases, resulting in ON contrast. (g) Distribution of green and UV MEI centre sizes across  $N=1,613$  cells (example MEIs from (a-c) indicated by arrows; symbols as shown on top of (a)). 95% of MEIs were within an angle of  $\pm 8^\circ$  of the diagonal (solid and dashed lines); MEIs outside of this range are coloured by cell type. (h) As (g) but for distribution of green and UV MEI temporal frequency. 95% of MEIs were within an angle of  $\pm 11.4^\circ$  of the diagonal (solid and dashed lines). (i) As (g) but for distribution of green and UV MEI centre contrast. MEI contrast is shifted away from the diagonal (dashed line) towards UV by an angle of  $33.2^\circ$  due to the dominance of UV-sensitive S-opsin in the ventral retina. MEIs at an angle  $> 45^\circ$  occupy the upper left, colour-opponent (UV<sup>ON</sup>-green<sup>OFF</sup>) quadrant. (j, k) Fraction of MEIs per cell type that lie outside the angle about the diagonal containing 95% of MEIs for centre size and temporal frequency. Broad RGC response types indicated as in (6). (l) Fraction of MEIs per cell type in the upper-left, colour-opponent quadrant for contrast.

197 It is important to note that MEIs should not be confused with or interpreted as the linear filters that result from  
198 classical approaches (e.g., reverse correlation). This is because they result from an optimisation procedure that aims  
199 at predicting the *optimal* stimulus for a cell. In fact, they can differ significantly from linear filters, for example by  
200 exhibiting more complexity and higher frequency components (32).  
201  
202  
203  
204

205 **MEIs reflect known functional RGC group properties.**  
206 The resulting MEIs were short, dichromatic movie clips; their spatial, temporal, and chromatic properties and interactions thereof are best appreciated in lower-dimensional visualisations (Figure 3a–c; more example MEIs in Figure 3-figure supplement III).  
207  
208  
209  
210

211 To analyse the MEIs in terms of these properties, we decomposed them into their spatial and temporal components, separately for green and UV, and parameterised the spatial component as a Difference-of-Gaussians (DoG) (40) (N=1,613 out of 1,947, see Methods). We then located MEIs along the axes in stimulus space corresponding to three properties: centre size, mean temporal frequency, and centre contrast, separately for green and UV (Figure 3d–f). These MEI properties reflect RGC response properties classically probed with synthetic stimuli, such as spots of different sizes (8), temporal frequency modulations (6), and stimuli of varying chromatic contrast (20, 21). Using the MEI approach, we were able to reproduce known properties of RGC groups (Figure 3g–i). For example, sustained ON  $\alpha$  RGCs ( $G_{24}$ ), which are known to prefer large stimuli (6, 36), had MEIs with large centres ( $G_{24}$ , N=20 cells: green centre size, mean  $\pm$  SD:  $195 \pm 82 \mu\text{m}$ ; UV centre size  $178 \pm 45 \mu\text{m}$ ; average across all RGC groups: green  $148 \pm 42 \mu\text{m}$ , UV  $141 \pm 42 \mu\text{m}$ ; see Figure 3g).  
212  
213  
214  
215  
216  
217  
218  
219  
220  
221  
222  
223  
224  
225  
226  
227  
228  
229  
230

231 The MEI's temporal frequency relates to the temporal frequency preference of an RGC: MEIs of  $G_{20}$  and  $G_{21}$ , termed ON high frequency and ON low frequency (6), had high and low average temporal frequency, respectively ( $G_{20}$ , N=40 cells, green, mean  $\pm$  SD:  $2.71 \pm 0.16$  Hz, UV  $2.86 \pm 0.22$  Hz;  $G_{21}$ , N=50 cells, green, mean  $\pm$  SD:  $2.32 \pm 0.63$  Hz, UV  $1.98 \pm 0.5$  Hz; see Figure 3h). Some MEIs exhibit fast oscillations (Figure 3e and Figure 3-figure supplement III). This is not an artefact but rather a consequence of optimising a stimulus to maximise activity over a 0.66 s time window (Figure 2d). To maximise the response of a transient RGC over several hundred milliseconds, it has to be stimulated repetitively, hence the oscillations in the MEI. Maximising the response over a shorter time period results in MEIs without oscillations (Figure 3-figure supplement 2III).  
232  
233  
234  
235  
236  
237  
238  
239  
240  
241  
242  
243  
244  
245

246 Finally, the contrast of an MEI reflects what is traditionally called a cell's ON vs. OFF preference: MEIs of ON and OFF RGCs had positive and negative contrasts, respectively (Figure 3i). An ON-OFF preference can be interpreted as a tuning map with two optima – one in the OFF- and one in the ON-contrast regime. For an ON-OFF cell, there are hence two stimuli that are approximately equally effective at eliciting responses from that cell. Conse-

254 quently, for the ON-OFF RGC groups, optimisation resulted in MEIs with ON or OFF contrast, depending on the relative strengths of the two optima and on the initial conditions (Figure 3-figure supplement 1II,  $G_{10}$ , and see Discussion).  
255  
256  
257  
258

259 MEIs were also largely consistent within functional RGC groups (Figure 3-figure supplement 1II). Where this was not the case, the heterogeneity of MEIs could be attributed to a known heterogeneity of cells within that group. For example, MEIs of  $G_{31}$  RGCs were diverse (Figure 3-figure supplement 1II), and the cells that were originally grouped to form  $G_{31}$  probably spanned several distinct types, as suggested by the group's unusually high coverage factor (6). Together, these results provided strong evidence that RGCs grouped based on responses to synthetic stimuli (chirp and MB) also form functional groups in natural movie response space.  
259  
260  
261  
262  
263  
264  
265  
266  
267  
268  
269

270 **CNN model predicts centre colour-opponency in RGC group  $G_{28}$ .** Our goal was to explore chromatic tuning of RGCs and to identify novel stimulus selectivities related to chromatic contrast. Therefore, we specifically focused on regions in stimulus space where a given stimulus property differs for green and UV. Therefore, for centre size and temporal frequency, we asked, which RGC groups contributed to the MEIs outside of the 95<sup>th</sup> percentile around the diagonal (Figure 3g,h,j,k). These 5% MEIs furthest away from the diagonal were almost exclusively contributed by ON cells; and among these, more so by slow than by fast ON cells.  
271  
272  
273  
274  
275  
276  
277  
278  
279  
280  
281

282 MEI contrast needed to be analysed differently than size and temporal frequency for two reasons. First, due to the dominance of UV-sensitive S-opsin in the ventral retina (17), stimuli in the UV channel were much more effective at eliciting RGC responses. As a result, the contrast of most MEIs is strongly shifted towards UV (Figure 3i). Second, contrast in green and UV can not only vary along positive valued axes (as is the case for size and temporal frequency), but can also take on opposite signs, resulting in colour-opponent stimuli. Whereas most MEIs had the same contrast polarity in both colour channels (i.e. both ON or OFF, Figure 3c, blue and turquoise trajectories), some MEIs had opposing contrast polarities in UV and green (Figure 3c, orange trajectory, and Figure 3i, upper left quadrant). Thus, for contrast, we asked which RGC groups contributed to colour-opponent MEIs (i.e. MEIs in the colour-opponent, upper left or lower right quadrant in Figure 3i). Again, slow ON RGCs made up most of the cells with colour-opponent MEIs. Here,  $G_{28}$  stood out: 66% (24/36) of all cells of this group had colour-opponent MEIs (UV<sup>ON</sup>-green<sup>OFF</sup>), followed by  $G_{27}$  with 42% colour-opponent MEIs.  
282  
283  
284  
285  
286  
287  
288  
289  
290  
291  
292  
293  
294  
295  
296  
297  
298  
299  
300  
301  
302

303 The colour-opponency we found in  $G_{28}$  was not centre-surround, as described before in mice (20), but rather a centre-opponency (“co-extensive” colour-opponent RF; reviewed in (43)), as can be seen in the lower-dimensional visualisations (Figure 3a,b, right column; 3c, orange trajectory).  
304  
305  
306  
307

308 In conclusion, our model-guided *in-silico* exploration of chromatic stimulus space revealed a variety of preferred stimuli that captured known properties of RGC groups,  
309  
310

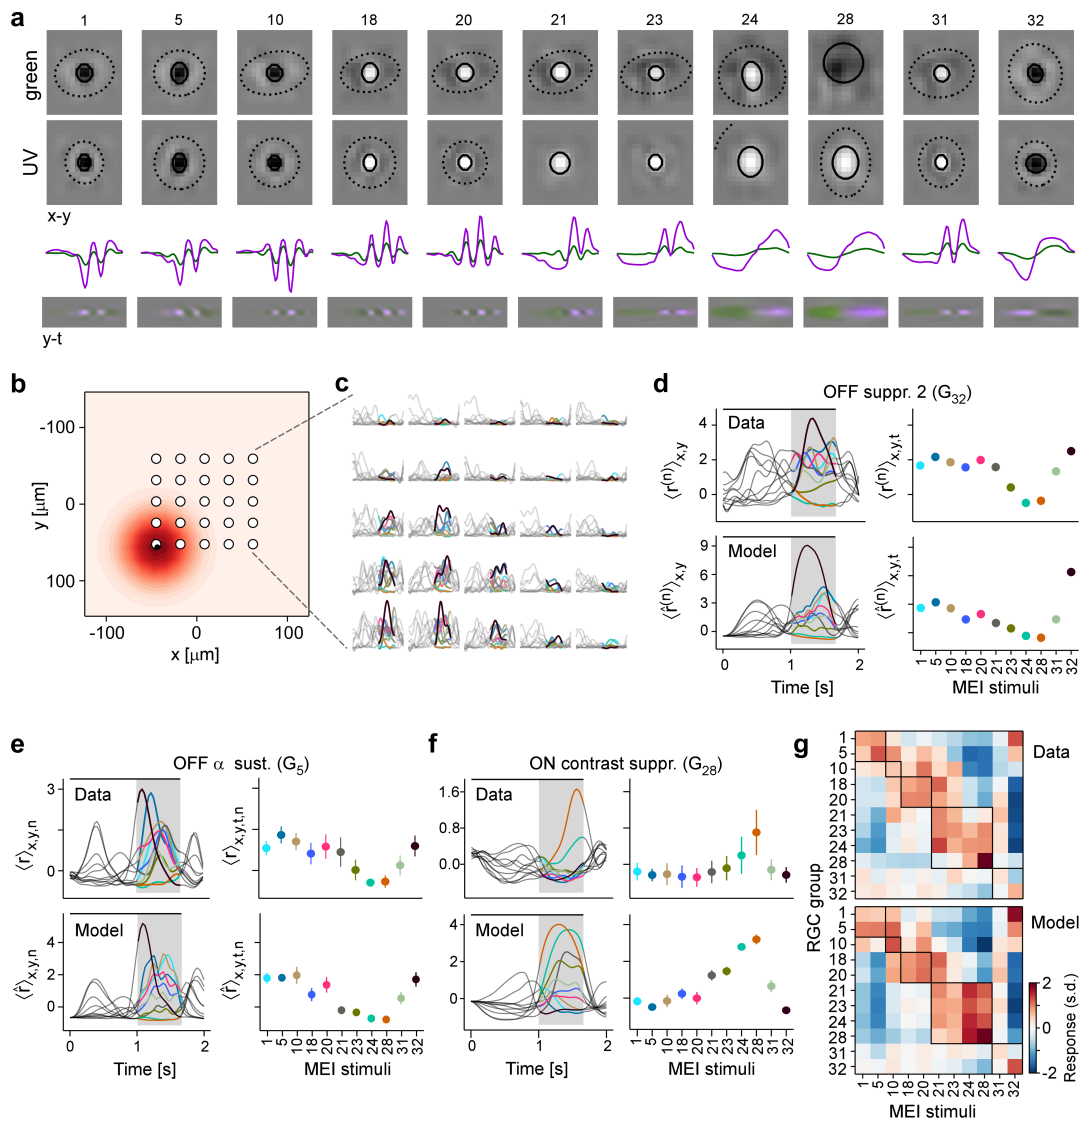

**Figure 4. Experiments confirm MEIs predicted by model** (a) MEIs shown during the experiment, with green and UV spatial components (top two rows), as well as green and UV temporal components (third row) and a spatio-temporal visualisation (fourth row). For display, spatial components  $s$  in the two channels were re-scaled to a similar range and displayed on a common grey-scale map ranging from  $-max(|s|)$  to white for  $max(|s|)$ , i.e. symmetric about 0 (grey). Relative amplitudes of UV and green are shown in the temporal components. (b) Illustration of spatial layout of MEI experiment. White circles represent  $5 \times 5$  grid of positions where MEIs were shown; red shading shows an example RF estimate of a recorded  $G_{32}$  RGC, with black dot indicating the RF centre position (Methods). (c) Responses of example RGC from (b) to the 11 different MEI stimuli at 25 different positions. (d) Recorded (top,  $r^{(n)}$ ) and predicted (bottom,  $\hat{r}^{(n)}$ ) responses to the 11 different MEIs for example RGC  $n$  from (b, c). Left: responses are averaged across the indicated dimensions  $x, y$  (different MEI locations); black bar indicates MEI stimulus duration (from 0 to 1.66 s), grey rectangle marks optimisation time window (from 1 to 1.66 s). Right: Response to different MEIs, additionally averaged across time ( $t$ ; within optimisation time window). (e, f) Same as in (d), but additionally averaged across all RGCs ( $n$ ) of  $G_5$  ( $N=6$ ) (e) and of  $G_{28}$  ( $N=12$ ) (f). Error bars show SD across cells. (g) Confusion matrix, each row showing the z-scored response magnitude of one RGC group (averaged across all RGCs of that group) to the MEIs in (a). Confusion matrix for recorded cells (top; "Data") and for model neurons (bottom; "Model"). Black squares highlight broad RGC response types according to (6): OFF cells, ( $G_{1,5}$ ) ON-OFF cells ( $G_{10}$ ), fast ON cells ( $G_{18,20}$ ), slow ON ( $G_{21,23,24}$ ) and ON contrast suppressed ( $G_{28}$ ) cells, and OFF suppressed cells ( $G_{31,32}$ ).

311 and revealed a preference of  $G_{28}$  RGCs for centre colour-  
 312 opponent,  $UV^{ON}$ -green $^{OFF}$  stimuli, a feature previously un-  
 313 known for this RGC group.

314 **Experiments confirm selectivity for chromatic contrast.** Next, we verified experimentally that the MEIs pre-  
 315 dicted for a given RGC group actually drive cells of that  
 316 group optimally. To this end, we performed new experi-  
 317 ments in which we added to our battery of stimuli a num-  
 318 ber of MEIs chosen according to the following criteria: We  
 319 wanted the MEIs to (i) span the response space (ON, ON-  
 320 OFF, OFF, transient, sustained, and contrast-suppressed)  
 321

322 and (ii) to represent both well-described RGC types, such  
 323 as  $\alpha$  cells (i.e.  $G_{5,24}$ ), as well as poorly understood RGC  
 324 types, such as suppressed-by-contrast cells ( $G_{28,31,32}$ ) (Fig-  
 325 ure 4a). We therefore chose MEIs of RGCs from groups  
 326  $G_1$  (OFF local),  $G_5$  (OFF  $\alpha$  sustained),  $G_{10}$  (ON-OFF local-  
 327 edge),  $G_{18}$  (ON transient),  $G_{20}$  (ON high frequency),  $G_{21}$   
 328 (ON low frequency),  $G_{23}$  (ON mini  $\alpha$ ),  $G_{24}$  (sustained ON  
 329  $\alpha$ ),  $G_{28}$  (ON contrast suppressed),  $G_{31}$  (OFF suppressed 1),  
 330 and  $G_{32}$  (OFF suppressed 2). For simplicity, in the follow-  
 331 ing we refer to the MEI of an RGC belonging to group  $g$  as  
 332 group  $g$ 's MEI, or MEI  $g$ .

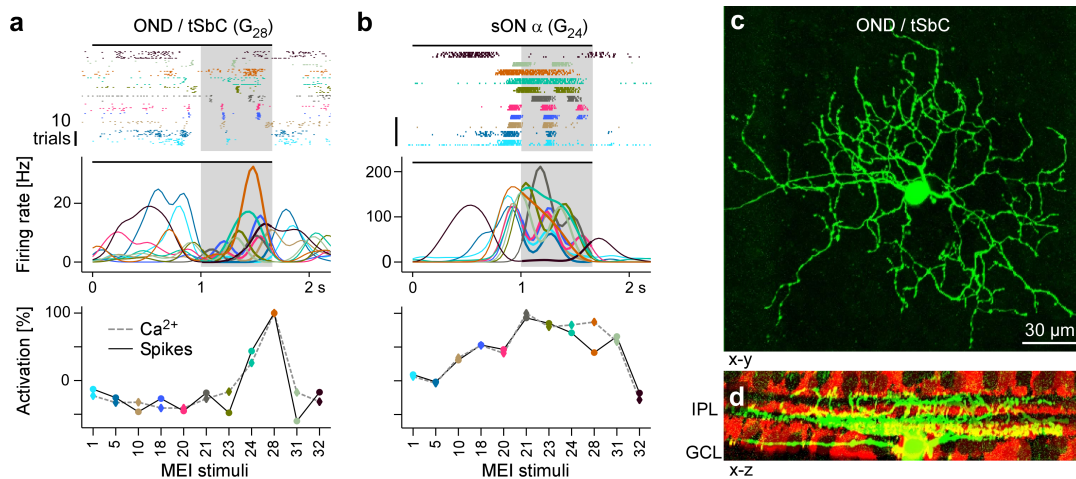

**Figure 5. Electrical single-cell recordings of responses to MEI stimuli confirm chromatic selectivity of tSbC RGCs.** (a) Spiking activity (top, raster plot; middle, firing rate) of a OND RGC in response to different MEI stimuli (black bar indicates MEI stimulus duration; grey rectangle marks optimisation time window, from 1 to 1.66 s). Bottom: Activation relative to mean as a function of MEI stimulus, averaged across cells (solid line, from electrical recordings, N=4; dashed line, from  $Ca^{2+}$  imaging, N=11 cells). Colours as in Figure 4. (b) Like (a) but for a sustained ON  $\alpha$  cell ( $G_{24}$ ; N=4 cells, both for electrical and  $Ca^{2+}$  recordings). (c) Different ON delayed (OND/tSbC,  $G_{28}$ ) RGC (green) dye-loaded by patch pipette after cell-attached electrophysiology recording (z-projection; x-y plane). (d) Cell from (c, green) as side-projection (x-z), showing dendritic stratification pattern relative to choline-acetyltransferase (ChAT) amacrine cells (tdTomato, red) within the inner plexiform layer (IPL).

333 We presented these MEIs on a regularly spaced  $5 \times 5$   
 334 grid to achieve approximate centring of stimuli on RGC RFs  
 335 in the recording field (Figure 4b,c). For these recordings,  
 336 we fit models whose readout parameters allowed us to estimate  
 337 the RGCs' RF locations. We used these RF location  
 338 estimates to calculate a spatially weighted average of  
 339 the responses to the MEIs displayed at different locations,  
 340 weighting the response at each location proportional to the  
 341 RF strengths at those locations (Figure 4b, red highlight,  
 342 and Figure 4d, top). We then performed the same experiment  
 343 *in-silico*, confirming that the model accurately predicts  
 344 responses to the MEIs (Figure 4d, bottom; Figure 4-figure  
 345 supplement 1IV). These experiments allowed us to evaluate  
 346 MEI responses at the RGC group level (Figure 4e-f; Figure  
 347 3-figure supplement 1 II).

348 We expected RGCs to show a strong response to their  
 349 own group's MEI, a weaker response to the MEIs of functionally  
 350 related groups, and no response to MEIs of groups with  
 351 different response profiles. Indeed, most RGC groups  
 352 exhibited their strongest ( $G_{5,20,21,28,32}$ ) or second-strongest  
 353 ( $G_{1,10,23}$ ) response to their own group's MEI (Figure 4g,  
 354 top). Conversely, RGC groups from opposing regions in  
 355 response space showed no response to each others' MEIs (e.g.  
 356  $G_{1,5}$  (OFF cells) vs.  $G_{21-28}$  (slow ON cells)). The model's  
 357 predictions showed a similar pattern (Figure 4g, bottom),  
 358 thereby validating the model's ability to generalise to the  
 359 MEI stimulus regime.

360 Notably,  $G_{28}$  RGCs responded very selectively to their  
 361 own MEI 28, displaying only weak responses to most  
 362 other MEIs (Figure 4f,g, selectivity index  $G_{28}$  to MEI 28  
 363  $SI_{G_{28}}(28)$  defined as the average difference in response between  
 364 MEI 28 and all other MEIs in units of standard deviation  
 365 of the response, mean  $\pm$  SD:  $2.58 \pm 0.76$ ; see Methods).  
 366 This was in contrast to other RGC groups, such as  $G_{23}$  and  
 367  $G_{24}$ , that responded strongly to MEI 28, but also to other  
 368 MEIs from the slow ON response regime (Figure 4g, top;

369 Figure 4-figure supplement 1 IV,  $SI_{G_{23}}(28)$ , mean  $\pm$  SD:  
 370  $1.04 \pm 0.69$ ,  $SI_{G_{24}}(28)$ , mean  $\pm$  SD:  $1.01 \pm 0.46$ ). Hence,  
 371 our validation experiments confirm the model's prediction  
 372 that RGC group  $G_{28}$  is selective for centre colour-opponent,  
 373 UV<sup>ON</sup>-green<sup>OFF</sup> stimuli.

374  **$G_{28}$  corresponds to the transient Suppressed-by-  
 375 Contrast RGC type.** Next, we sought to identify which  
 376 RGC type  $G_{28}$  corresponds to. In addition to its unique  
 377 centre colour-opponency, the responses of  $G_{28}$  displayed a  
 378 pronounced transient suppression to temporal contrast modulations  
 379 (cf. chirp response in Figure 1e). Therefore, we hypothesised  
 380 that  $G_{28}$  corresponds to the transient Suppressed-by-  
 381 Contrast (tSbC) RGC type (37, 38, 44), which is one of  
 382 three retinal SbC RGC types identified so far and is also referred  
 383 to as ON delayed (OND) cell because of its delayed  
 384 response onset (45).

385 To test this hypothesis, we performed cell-attached  
 386 electrophysiology recordings (Figure 5) targeting  
 387 tSbC/OND cells (N=4), identified by their responses  
 388 to spots of multiple sizes (8), and later confirmed by their  
 389 distinctive morphology ((45); type 73 in (9)) (Figure 5c,d).  
 390 We recorded spikes while presenting the MEI stimuli  
 391 (Figure 5a, top). Just like  $G_{28}$  RGCs in the  $Ca^{2+}$  imaging,  
 392 tSbC/OND cells exhibited a pronounced selectivity for MEI  
 393 28, and were suppressed by most other MEIs (Figure 5a,  
 394 middle and bottom). Notably, the characteristic delayed  
 395 response onset was visible in both the  $Ca^{2+}$  (Figure 4f, top)  
 396 and electrical (Figure 5a) responses but was not predicted  
 397 by the model (Figure 4f, bottom).

398 As a control, we also recorded MEI responses of a  
 399 different, well-characterised RGC type, sustained (s) ON  
 400  $\alpha$  ( $G_{24}$ ; (46)) (Figure 5b, top; N=4). Again, the electrical  
 401 recordings of the cells' MEI responses yielded virtually  
 402 the same results as the  $Ca^{2+}$  imaging (Figure 5b, middle  
 403 and bottom; cf. Figure 4-figure supplement 1IV). Crucially,  
 404 sON  $\alpha$  cells were not selective for MEI 28. The fact that

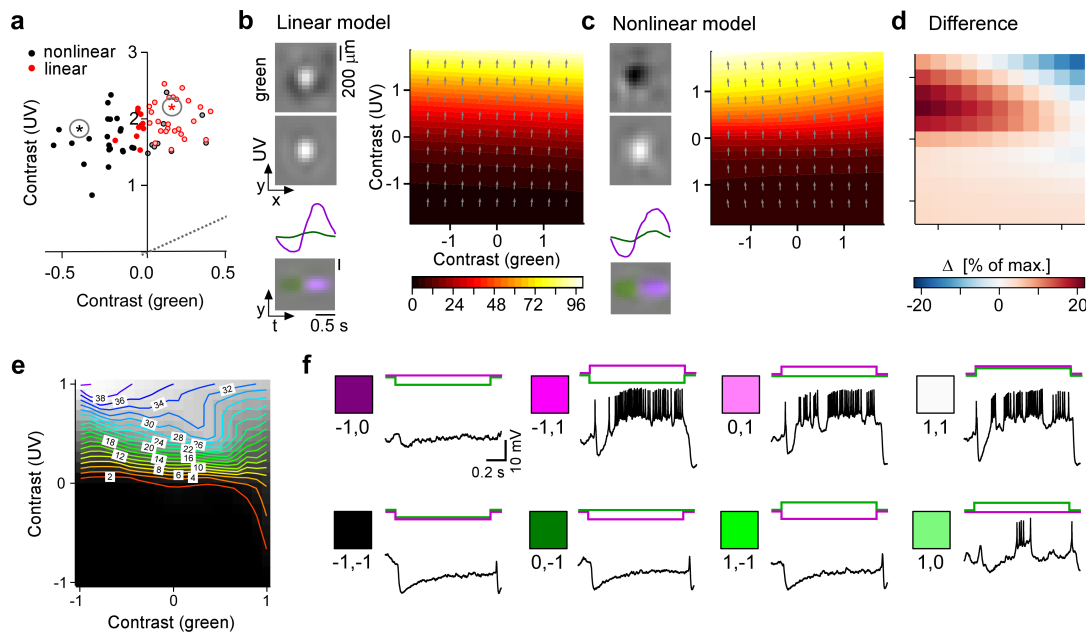

**Figure 6. Chromatic contrast selectivity of  $G_{28}$  RGCs derives from a nonlinear transformation of stimulus space** (a) Distribution of green and UV MEI centre contrast for a linear-nonlinear (LN) model (red) and a nonlinear CNN model (black). Colour-opponent cells highlighted by filled marker. (b,c) Left: MEIs for an example cell of RGC group  $G_{28}$ , generated with the LN model (b) or the CNN model (c). The cell's MEI centre contrast for both models is marked in (a) by asterisks. Right: Respective tuning maps of example model neuron in chromatic contrast space. Colours represent responses in % of maximum response; arrows indicate the direction of the response gradient across chromatic contrast space. (d) Difference in response predicted between LN and CNN model (in % of maximum response). (e) Contour plot of activity vs. green and UV contrast for an example tSbc ( $G_{28}$ ) RGC measured in whole-cell current-clamp mode. Labels on the contour plot indicate spike count along isoresponse curves. (f) Traces are examples of responses at the 8 extremes of -100%, 0, or 100% contrast in each colour channel.

405 these experiments with precise positioning of stimuli on the  
 406 cells' RFs elicited the same responses as the 2P experiments  
 407 confirms the validity of the grid-approach for stimulus pre-  
 408 sentation used in the latter.

409 **Chromatic contrast selectivity derives from a nonlin-**  
 410 **ear transformation of stimulus space.** Next, we asked  
 411 whether  $G_{28}$  (tSbc) RGC's selectivity is a linear feature, as  
 412 could be achieved by two linear filters with opposite signs  
 413 for the two colour channels, or whether it is a nonlinear  
 414 feature. To address this question, we tested whether an  
 415 LN model (implemented using convolutions; see Methods)  
 416 could recover the chromatic selectivity of  $G_{28}$  by predicting  
 417 MEIs using the LN model (Figure 6). We found that the  
 418 LN model predicted colour-opponent MEIs for only 9 out  
 419 of 36 (25%)  $G_{28}$  RGCs (nonlinear CNN: 24 out of 36 (66%)  
 420 colour-opponent MEIs; Figure 6a-c). This finding argues  
 421 against the possibility that  $G_{28}$ 's colour opponency can be  
 422 explained on the computational level by two opposite-sign  
 423 linear filters operating on the two colour channels, which  
 424 could be recovered by a LN model. Instead, it suggests the  
 425 presence of a nonlinear dependency between chromatic con-  
 426 trast (of the stimulus) and chromatic selectivity (of the cell).  
 427 In other words,  $G_{28}$  RGCs process stimuli differently de-  
 428 pending on their chromatic contrast, a nonlinear feature that  
 429 cannot be accurately captured by a LN model that makes  
 430 a single estimate of the linear filter for the whole stimulus  
 431 space.

432 To understand the nature of this dependency, we ex-  
 433 panded the estimate of the model RGCs' tuning to colour  
 434 contrast around the maximum (the MEI). We did this by

435 mapping the model neurons' response and its gradient in 2D  
 436 chromatic contrast space (Figure 6c). This analysis revealed  
 437 that, indeed,  $G_{28}$  RGCs have a nonlinear tuning for colour  
 438 contrast: they are strongly UV-selective at lower contrasts,  
 439 but become colour-opponent, i.e. additionally inhibited by  
 440 green, for higher contrasts. For individual neurons with very  
 441 strong colour-opponency that extends over a large region of  
 442 chromatic contrast space, also the LN model's approxima-  
 443 tion reflects this colour-opponency, which demonstrates that  
 444 the LN model can in principle model colour-opponency, too  
 445 (Figure 5-figure supplement 1V). We confirmed the model's  
 446 predictions about  $G_{28}$ 's nonlinear tuning for colour contrast  
 447 experimentally by electrically recording from morphologi-  
 448 cally identified  $G_{28}$  (tSbc) RGCs (Figure 6e,f). The ex-  
 449 ample cell shown in the figure exhibits the same nonlinear  
 450 tuning in chromatic contrast space, with the firing rate (Fig-  
 451 ure 6f) and, consequently, the tuning curve (Figure 6e) peak-  
 452 ing for UV<sup>ON</sup>-green<sup>OFF</sup> stimuli.

453 The nonlinearity in tuning to colour contrast of  $G_{28}$   
 454 RGCs leads to a warping of stimulus space (Figure 6) that  
 455 amplifies the distance of colour-opponent stimuli from non-  
 456 colour-opponent stimuli and thereby increases their discrim-  
 457 inability. We therefore hypothesised that the representation  
 458 of visual input formed by  $G_{28}$  might serve to detect an etho-  
 459 logically relevant, colour-opponent feature from the visual  
 460 scene. What may be this feature?

461 **Warped representation allows for detection of**  
 462 **ground-to-sky transitions.** Studies analysing visual  
 463 scenery from the mouse's perspective have repeatedly  
 464 found that chromatic contrast changes strongly at the



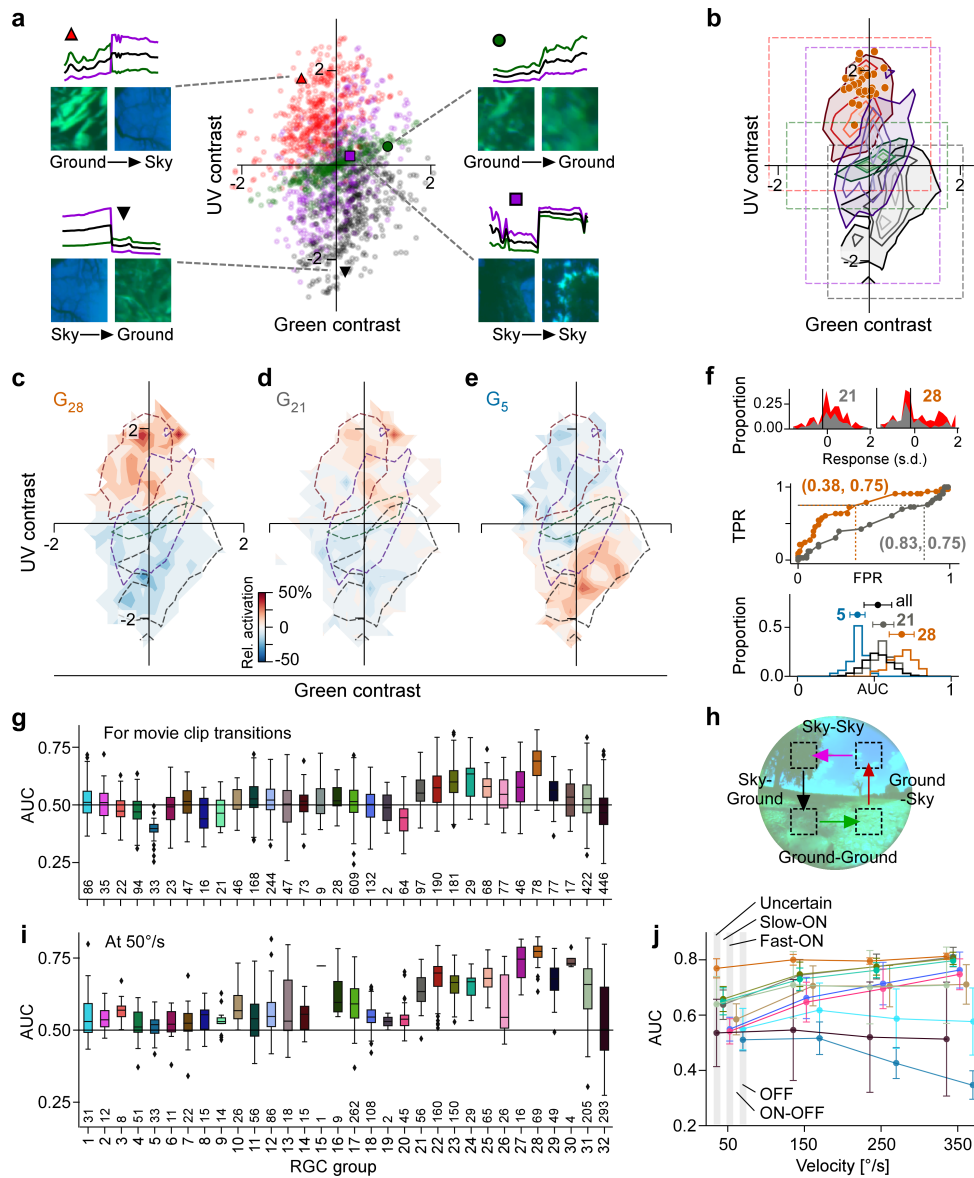

**Figure 7. Chromatic contrast tuning allows detection of ground-to-sky transitions** (a) Distribution of green and UV contrasts of all movie inter-clip transitions (centre), separately for the 4 transition types, for each of which an example is shown: ground-to-sky (N=525, top left, red triangle), sky-to-ground (N=480, bottom left, black downward triangle), and sky-to-sky (N=499, bottom right, purple square). Images show last and first frame of pre- and post-transition clip, respectively. Traces show mean full-field luminance of green and UV channels in last and first 1 s of pre- and post-transition clip. Black trace shows luminance averaged across colour channels. (b) Distributions as in (a), but shown as contours indicating isodensity lines of inter-clip transitions in chromatic contrast space. Density of inter-clip transitions was estimated separately for each type of transition from histograms within  $10 \times 10$  bins that were equally spaced within the coloured boxes. Four levels of isodensity for each transition type shown, with density levels at 20% (outermost contour, strongest saturation), 40%, 60% and 80% (innermost contour, weakest saturation) of the maximum density observed per transition: 28 sky-to-ground (black), 75 ground-to-ground (green), 42 sky-to-sky (purple) and 45 ground-to-sky (red) transitions per bin. Orange markers indicate locations of N=36  $G_{28}$  MEIs in chromatic contrast space (cf. Figure 3i). (c) Tuning map of  $G_{28}$  RGCs (N=78), created by averaging the tuning maps of the individual RGCs, overlaid with outermost contour lines from (b) (cf. Figure 6-figure supplement 2VIIb). (d,e) Same as (c) for  $G_{21}$  ((g), N=97) and  $G_5$  ((h), N=33). (f) *Top*: Illustration of ROC analysis for two RGCs, a  $G_{21}$  (left) and a  $G_{28}$  (right). For each RGC, responses to all inter-clip transitions were binned, separately for ground-to-sky (red) and all other transitions (grey). *Middle*: Sliding a threshold  $d$  across the response range, classifying all transitions with response  $> d$  as ground-to-sky, and registering the false-positive-rate (FPR) and true-positive-rate (TPR) for each threshold yields an ROC curve. Numbers in brackets indicate (FPR, TPR) at the threshold indicated by vertical line in histograms. *Bottom*: Performance for each cell, quantified as area under the ROC curve (AUC), plotted as distribution across AUC values for all cells (black),  $G_{21}$  (grey),  $G_5$  (blue), and  $G_{28}$  (orange); AUC mean  $\pm$  SD indicated as dots and horizontal lines above histograms. (g) Boxplot of AUC distributions per cell type. The box extends from the first quartile ( $Q_1$ ) to the third quartile ( $Q_3$ ) of the data; the line within a box indicates the median. The whiskers extend to the most extreme points still within  $[Q_1 - 1.5 \times IQR, Q_3 + 1.5 \times IQR]$ , IQR = inter-quartile range. Diamonds indicate points outside this range. All elements of the plot (upper and lower boundaries of the box, median line, whiskers, diamonds) correspond to actual observations in the data. Numbers of RGCs for each type are indicated in the plot. (h) Illustration of stimulus with transitions as in (a) but at different velocities (50, 150, 250, and 350°/s). (i) Like (g) but for model cells and transition movies from (h) at 50°/s. (j) AUC as function of transition velocity for example RGC groups ( $G_{(1,5)}$ , (10), (18,20), (21, 23, 24), (28, 31, 32)).

horizon (5, 21, 39, 40).  $G_{28}$  RGCs are selective to this kind of change in chromatic contrast: their MEI consists of a spatially extensive and sustained change in luminance from green to UV. We hypothesised that this change in chromatic contrast might serve as a proxy for detecting changes in visual context, as might be elicited when a cell's RF transitions across the horizon. Such transitions could be caused by head or eye movements, and detecting this change in visual context (i.e. ground vs. sky) may help interpreting signals in other RGC channels.

To test if  $G_{28}$  (tSbC) RGCs respond to such a stimulus, we used the transitions between movie clips (*inter-clip transitions*; cf. Figure 1b) as a proxy for the type of visual input elicited by head or eye movements: ground-to-ground and sky-to-sky transitions for horizontal movements without change in visual context, and ground-to-sky and sky-to-ground transitions for vertical movements with a change in visual context. We then calculated the contrast of these transitions in the green and UV channel and mapped them to the chromatic contrast stimulus space (Figure 7a). We found that ground-to-ground and sky-to-sky transitions were distributed along the diagonal, whereas the two transitions resembling visual input elicited by vertical movements crossing the horizon fell into the two colour-opponent quadrants: sky-to-ground transitions in the lower right quadrant, and ground-to-sky transitions in the upper left quadrant (Figure 7a,b). The  $UV^{ON}\text{-green}^{OFF}$  MEIs 28 share a location in stimulus space with ground-to-sky transitions in terms of chromatic contrast (cf. Fig 3i).

Do  $G_{28}$  RGCs indeed respond strongly to visual context changes as occur in ground-to-sky transitions, i.e. to the “naturally occurring version” of their MEIs? To address this question, we extracted the RGC responses to the inter-clip transitions, thereby mapping out their tuning across chromatic contrasts (Figure 6-figure supplement 1VI, Figure 6-figure supplement 6VIIb), and then averaged the resulting single-cell tuning maps for each RGC group (for examples, see Figure 7c-e).  $G_{28}$  is most strongly tuned to full-field transitions in the upper left quadrant containing mostly ground-to-sky inter-clip transitions (Figure 7c) – unlike, for example, non-colour-opponent reference RGC groups from the slow ON and OFF response regime (Figure 7d,e).

Could a downstream visual area detect ground-to-sky visual context changes based on input from  $G_{28}$  RGCs? To answer this question, we performed a linear detection analysis for each RGC by sliding a threshold across its responses to the inter-clip transitions, classifying all transitions that elicited an above-threshold response as ground-to-sky, and evaluating false-positive and true-positive rates (FPR and TPR, respectively) for each threshold (Figure 7f). Plotting the resulting TPRs for all thresholds as a function of FPRs yields a receiver operating characteristic (ROC) curve (47) (Figure 7f, middle). The area under this curve (AUC) can be used as a measure of detection performance: it is equivalent to the probability that a given RGC will respond more strongly to a ground-to-sky transition than to any other type of transition. Indeed,  $G_{28}$  RGCs achieved the highest AUC

on average (Figure 7f, bottom, and g;  $G_{28}$ , mean  $\pm$  SD AUC (N=78 cells):  $0.68 \pm 0.08$ ; two-sample permutation test  $G_{28}$  vs. all other groups with at least N=4 cells (see Methods), significant for each group, with  $\alpha = 0.0017$  Bonferroni-corrected for 30 multiple comparisons).

Ground-to-sky transitions and, therefore visual context changes, can also appear in the lower visual field, that is, on the dorsal retina, where RGCs receive weaker UV input (20). Therefore, we recorded additional fields in the dorsal retina (Figure 6-figure supplement 2VIIa) and found also here that  $G_{28}$  (tSbC) RGCs displayed the strongest tuning to ground-to-sky transitions among all dorsal RGCs (Figure 6-figure supplement 2VIIc-h, for statistics, see legends).

Visual context changes triggered by different behaviours, such as locomotion and head or eye movements will differ strongly with respect to their statistics – in particular with respect to their speed. Therefore, for  $G_{28}$  (tSbC) RGCs to play a role in detecting context changes, their detection performance should be robust across velocities. To test whether this is the case, we conducted additional *in-silico* experiments where we predicted responses of all RGC groups to stimuli simulating transitions across the visual field with and without context change (Figure 7h) at different velocities: 50, 150, 250, and 350 visual degrees per second ( $^{\circ}/s$ ; see Methods; Figure 6-figure supplement 3VIIIa,b) The slowest speed simulated visual input as could be elicited by locomotion, and the fastest speed approached that of saccades (48). We then performed an ROC analysis on the model cell responses, which confirmed that  $G_{28}$  RGCs could distinguish ground-to-sky context changes from all other types of transitions robustly across different speeds (Figure 7i,j). Interestingly, the advantage of  $G_{28}$  over other RGC groups in performing this detection task diminished with increasing speed (Figure 6-figure supplement 3VIIIc,d); see also Discussion).

Together, these analyses demonstrate that a downstream area, reading out from a single RGC group, would achieve the best performance in detecting ground-to-sky context changes if it based its decisions on inputs from  $G_{28}$  RGCs, robustly across different lighting conditions (transitions between movie snippets), retinal location (ventral and dorsal), and speeds. Since such an area would receive input not from a single cell, but from a local population of cells, the detection performance of single cells should represent a lower bound to that area's detection performance.

## Discussion

We combined large-scale recordings of RGC responses to natural movie stimulation with CNN-based modelling to investigate colour processing in the mouse retina. By searching the stimulus space *in silico* to identify *most exciting inputs* (MEIs), we found a novel type of chromatic tuning in tSbC RGCs. We revealed this RGC type's pronounced and unique selectivity for full-field changes from green-dominated to UV-dominated scenes, a stimulus that matches the chromatic statistics of ground-to-sky transitions in natural scenes. Therefore, we suggest that tSbC cells may signal

578 context changes within their RF. Beyond our focus on tSbC  
579 cells, our study demonstrates the utility of an *in silico* ap-  
580 proach for generating and testing hypotheses about the etho-  
581 logical relevance of sensory representations.

582 **Nonlinear approaches for characterising neuronal**  
583 **selectivities and invariances.** We leverage image-  
584 computable models in combination with an optimisation  
585 approach to search in dynamic, chromatic stimulus space  
586 for globally optimal inputs for RGCs, the MEIs. The result-  
587 ing MEI represents the peak in the nonlinear loss landscape  
588 that describes the neuron’s tuning in high-dimensional  
589 stimulus space. This approach has also been used to reveal  
590 the complexities and nonlinearities of neuronal tuning in  
591 monkey visual cortex area V4 (33, 42) and mouse area V1  
592 (32, 34). Still, these approaches are not the “silver bullet”  
593 for identifying nonlinear selectivities. One important  
594 limitation is that searching for the *most* exciting input will  
595 return a single input – even when there are several inputs  
596 that would elicit equal response, such as ON and OFF  
597 stimuli for ON-OFF cells (see Figure II, G<sub>10</sub> MEIs). A  
598 remedy for this limitation is to search for *diverse* exciting  
599 inputs by generating stimuli that are both highly effective at  
600 eliciting neural responses and at the same time distinct from  
601 one another. Ding et al. (49) used this approach to study  
602 bipartite invariance in mouse V1 (see also (50)). Related to  
603 this, Goldin et al. (51) searched for locally optimal stimulus  
604 perturbations for mouse RGCs and found that the selectivity  
605 for positive or negative contrast in a subset of cells is  
606 context-dependent. These cells signal absolute contrast, i.e.  
607 they are invariant to contrast polarity (“classical” ON vs.  
608 OFF). Together, these studies showcase the versatility of the  
609 toolkit of optimisation-based approaches at characterising  
610 nonlinear neuronal operations in high-dimensional, natural  
611 stimulus spaces. We add to this toolkit by first searching  
612 for a globally optimal stimulus, and then searching locally  
613 in its vicinity to map the cells’ loss landscape around the  
614 maximum.

615 **Circuit mechanisms for colour-opponency in tSbC**  
616 **RGCs.** Most previous studies of colour-opponency in the  
617 mouse retina have identified sparse populations of colour-  
618 opponent RGCs that have not been systematically assigned  
619 to a particular functional type (20, 21, 52). The only studies  
620 that have examined the mechanisms of colour-opponency in  
621 identified mouse RGC types showed a centre-surround or-  
622 ganisation, with RF centre and surround having different  
623 chromatic preferences ((18, 53); and (54), but see (55)).  
624 While we do not specifically analyse centre-surround op-  
625 ponency in this study, we see a similar trend as described  
626 previously in many RGC types, with stronger surrounds  
627 in the green channel relative to the UV channel (see Fig-  
628 ure 4a, Figure 3-figure supplement III). tSbC RGCs, in  
629 contrast, respond to spatially co-extensive colour-opponent  
630 stimuli, functionally reminiscent of colour-opponent RGCs  
631 in Guinea pig (56) and ground squirrels (57).

632 In mice, centre-surround opponency has been at-  
633 tributed to the opsin gradient (53) and rod contributions in

634 the outer retina (18, 20), whereas the circuitry for spatially  
635 co-extensive opponency remains unknown. It seems un-  
636 likely, though, that the opsin gradient plays a major role  
637 in the tSbC cell’s colour opponency, because both ventral  
638 and dorsal tSbC cells preferentially responded to full-field  
639 green-to-UV transitions. In primates, spatially co-extensive  
640 colour-opponency in small bistratified RGCs is thought to  
641 arise from the selective wiring of S-ON and M/L-OFF bipo-  
642 lar cells onto the inner and outer dendritic strata, respec-  
643 tively ((58), but see (59)). A similar wiring pattern seems  
644 unlikely for tSbC RGCs, since their inner dendrites do not  
645 co-stratify with the S-ON (type 9) bipolar cells, nor do their  
646 outer dendrites co-stratify with the candidate M-OFF bipo-  
647 lar cell (type 1) (60). The bistratified dendritic arbour distin-  
648 guishes the mouse tSbC also from the colour-opponent ON  
649 RGC type in Guinea pig, which is monostratified (56).

650 The large RF centres of the tSbC cells, extending well  
651 beyond their dendritic fields, come from a non-canonical cir-  
652 cuit, in which tonic inhibition onto the RGC via GABA<sub>B</sub>  
653 receptors is relieved via serial inhibition from different  
654 amacrine cells using GABA<sub>C</sub> receptors (36). An intriguing  
655 possibility is that a colour-selective amacrine cell is part of  
656 this circuit, perhaps supporting chromatically tuned disinhi-  
657 bition in the absence of selective wiring from the aforemen-  
658 tioned cone-selective bipolar cells onto the RGC.

659 **A new functional role for tSbC RGCs.** Suppressed-by-  
660 contrast responses have been recorded along the early visual  
661 pathway in dorsal lateral geniculate nucleus (dLGN), supe-  
662 rior colliculus (SC), and primary visual cortex (V1) (61–63),  
663 with their function still being debated (64). In the retina,  
664 three types of SbC RGCs have so far been identified (re-  
665 viewed in (45)), among them the tSbC cell (36–38). De-  
666 spite their relatively recent discovery, tSbC RGCs have been  
667 suggested to play a role in several different visual computa-  
668 tions. The first report of their light responses in mice con-  
669 nected them to the SbC RGCs previously discovered in rab-  
670 bit, cat, and macaque, and suggested a role in signalling self-  
671 generated stimuli, perhaps for saccade suppression (37).  
672 Aided by a new intersectional transgenic line to selectively  
673 label tSbC RGCs (38), their projections were traced to areas  
674 in SC, v- and dLGN, and nucleus of the optic tract (NOT).  
675 The latter stabilises horizontal eye movements; however, as  
676 the medial terminal nucleus (MTN), which serves stabilisa-  
677 tion of vertical eye movements, lacks tSbC innervation, it  
678 is unclear whether and how these RGCs contribute to gaze  
679 stabilisation.

680 A retinal study identified the circuit mechanisms re-  
681 sponsible for some of the unique spatial and temporal re-  
682 sponse properties of tSbC cells and suggested a possible role  
683 in defocus detection to drive emmetropization in growing  
684 eyes and accommodation in adults (36, 65). Here, we iden-  
685 tified another potential role for these RGCs in vision based  
686 on the chromatic properties of their RFs: signalling visual  
687 context changes (see next section). These different possible  
688 functional roles are not mutually exclusive, and might even  
689 be complementary in some cases, highlighting the difficulty  
690 in assigning single features to distinct RGC types (16). In

particular, the centre colour-opponency that we discovered in tSbC RGCs could serve to enhance their role in defocus detection by adding a directional signal (myopic vs. hyperopic) based on the chromatic aberration of lens and cornea (66). Future studies may test these theories by manipulating these cells *in vivo* using the new transgenic tSbC mouse line (38).

### Behavioural relevance of context change detection.

The horizon is a prominent landmark in visual space: it bisects the visual field into two regions, ground and sky. This is particularly relevant in animals like mice, where eye motion largely accounts for head movements and keeps the visual field stable with respect to the horizon (48). Visual stimuli carry different meaning depending on where they occur relative to the horizon, and context-specific processing of visual inputs is necessary for selecting appropriate behavioural responses (reviewed in (67)). For example, it is sensible to assume that a looming stimulus above the horizon is a predator, the appropriate response to which would be avoidance (that is, escape or freezing). A similar stimulus below the horizon, however, is more likely to be harmless or even prey. To allow for time-critical perceptual decisions – predator or prey – and corresponding behavioural response selection – avoidance or approach – it might be useful that stimulus (e.g., dark moving spot) and contextual information converge soon in the visual circuitry. Notably, VGluT3-expressing amacrine cells (a “hub” for distributing information about motion) represent a shared element in upstream circuitry, providing opposite-sign input to tSbC and to RGCs implicated in triggering avoidance behaviour, such as tOFF  $\alpha$  (13, 46) and W3 cells (68). In downstream circuitry, SbC inputs have been found to converge with “conventional” RGC inputs onto targets in dLGN and NOT; whether tSbC axons specifically converge with tOFF  $\alpha$  or W3 axons remains to be tested. Such convergence may allow “flagging” the activity of these RGCs with their local context (sky/threat or ground/no threat).

Depending on the behaviour that elicits a context change – be it a head or eye movement or locomotion – the parameters of the incoming stimulus, such as illumination level and velocity, may change. To be behaviourally useful, a context-change-flagging signal needs to be reliable and robust across these different stimulus parameters. While many slow-ON RGCs achieve high detection performance at higher transition velocities, probably reacting to the increasingly flash-like stimuli, tSbC RGCs were the only type with robustly high performance across different levels of illumination and all simulated speeds.

### *In-silico* approaches to linking neural tuning and function.

The modelling of retinal responses to natural stimuli has advanced our understanding of the complexity of retinal processing in recent years. As suggested in a recent review, it is helpful to consider the contributions of different studies in terms of one of three perspectives on the retinal encoding of natural scenes: The circuit perspective (“how?”), the normative perspective (“why?”), and the cod-

ing perspective (“what?”) (69). For example, an *in-silico* dissection of a CNN model of the retina offered explanations on how the surprisingly complex retinal computations, such as motion reversal, omitted stimulus response, and polarity reversal, emerge from simpler computations within retinal circuits (26, 27). Taking on the normative perspective, anatomically constrained deep CNNs trained on image recognition suggested a dependency between the complexity of retinal representations and the computational power of downstream cortical networks: Whereas a computationally powerful cortex, as found in primates, can deal with faithful, linear representations of visual inputs, a simpler cortical circuitry, as found in mice, requires more complex feature extraction upstream in the retina ((70, 71); but see (72)). However, the full potential of CNN models as tools for understanding sensory processing goes beyond response prediction and reproducing effects that are already described in the literature.

Here, we developed an approach that allows investigating the complexity of retinal processing simultaneously from the coding and the normative perspectives: A global search for most exciting mouse RGC inputs in dynamic, chromatic stimulus space answers the question of *what* it is that retinal neurons encode. Interpreting the abstract features extracted by the retina against the backdrop of natural stimulus space points to *why* these features might be behaviourally relevant. And finally, classifying individual RGCs into types then allows to bring in the circuit perspective through targeted experiments aimed at dissecting *how* specific retinal computations are implemented.

## Methods

**Animals and tissue preparation.** All imaging experiments were conducted at the University of Tübingen; the corresponding animal procedures were approved by the governmental review board (Regierungspräsidium Tübingen, Baden-Württemberg, Konrad-Adenauer-Str. 20, 72072 Tübingen, Germany) and performed according to the laws governing animal experimentation issued by the German Government. All electrophysiological experiments were conducted at Northwestern University; the corresponding animal procedures were performed according to standards provided by Northwestern University Center for Comparative Medicine and approved by the Institutional Animal Care and Use Committee (IACUC).

For all imaging experiments, we used 4- to 15-week-old C57Bl/6 J mice (n=23; JAX 000664) of either sex (10 male, 13 female). These animals were housed under a standard 12 h day/night rhythm at 22° and 55% humidity. On the day of the recording experiment, animals were dark-adapted for at least 1 h, then anaesthetised with isoflurane (Baxter) and killed by cervical dislocation. All following procedures were carried out under very dim red (> 650 nm) light. The eyes were enucleated and hemisected in carboxygenated (95% O<sub>2</sub>, 5% CO<sub>2</sub>) artificial cerebrospinal fluid (ACSF) solution containing (in mM): 125 NaCl, 2.5 KCl, 2 CaCl<sub>2</sub>, 1 MgCl<sub>2</sub>, 1.25 NaH<sub>2</sub>PO<sub>4</sub>, 26 NaHCO<sub>3</sub>, 20 glu-

803 cose, and 0.5 L-glutamine at pH 7.4. Next, the retinae were  
804 bulk-electroporated with the fluorescent  $\text{Ca}^{2+}$  indicator Ore-  
805 gon-Green BAPTA-1 (OGB-1), as described earlier (73).  
806 In brief, the dissected retina was flat-mounted onto an An-  
807 odisc (#13, 0.2  $\mu\text{m}$  pore size, GE Healthcare) with the RGCs  
808 facing up, and placed between a pair of 4-mm horizontal  
809 plate electrodes (CUY700P4E/L, Nepagene/Xceltis). A 10-  
810  $\mu\text{l}$  drop of 5 mM OGB-1 (hexapotassium salt; Life Tech-  
811 nologies) in ACSF was suspended from the upper electrode  
812 and lowered onto the retina. Next, nine pulses ( $\approx 9.2\text{ V}$ ,  
813 100 ms pulse width, at 1 Hz) from a pulse generator/wide-  
814 band amplifier combination (TGP110 and WA301, Thurlby  
815 handar/Farnell) were applied. Finally, the tissue was placed  
816 into the microscope's recording chamber, where it was per-  
817 fused with carboxygenated ACSF (at  $\approx 36^\circ\text{C}$ ) and left to  
818 recover for  $\geq 30$  min before recordings started. To visu-  
819 alise vessels and damaged cells in the red fluorescence  
820 channel, the ACSF contained  $\approx 0.1\ \mu\text{M}$  Sulforhodamine-  
821 101 (SR101, Invitrogen) (74). All procedures were carried  
822 out under dim red ( $> 650\text{ nm}$ ) light.

823 For electrophysiology experiments, we used ChAT-Cre  
824 (JAX 006410) x Ai14 (JAX 007914) mice on a C57Bl/6J  
825 background ( $n=2$ , male, aged 27 and 30 weeks). Mice were  
826 housed with siblings in groups up to 4, fed normal mouse  
827 chow and maintained on a 12:12 h light/dark cycle. Be-  
828 fore the experiment, mice were dark-adapted overnight and  
829 sacrificed by cervical dislocation. Retinal tissue was iso-  
830 lated under infrared illumination (900 nm) with the aid  
831 of night-vision goggles and IR dissection scope attach-  
832 ments (BE Meyers). Retinal orientation was identified us-  
833 ing scleral landmarks (75), and preserved using relieving  
834 cuts in cardinal directions, with the largest cut at the dor-  
835 sal retina. Retinas were mounted on 12mm poly-D-lysine  
836 coated glass affixed to a recording dish with grease, with  
837 the GCL up. Oxygenation was maintained by superfus-  
838 ing the dish with carboxygenated Ames medium (US Bi-  
839 ological, A1372-25) warmed to  $32^\circ\text{C}$ . For cell-attached  
840 single cell recordings, we used Symphony software (<https://symphony-das.github.io/>) with custom extensions (<https://github.com/Schwartz-AlaLaurila-Labs/sa-labs-extension>).

841 Owing to the exploratory nature of our study, we did  
842 not use randomisation and blinding. No statistical methods  
843 were used to predetermine sample size.

846 **Two-photon calcium imaging.** We used a MOM-type  
847 two-photon microscope (designed by W. Denk; pur-  
848 chased from Sutter Instruments) (74, 76), which was  
849 equipped with a mode-locked Ti:Sapphire laser (MaiTai-HP  
850 DeepSee, Newport Spectra-Physics) tuned to 927 nm, two  
851 fluorescence detection channels for OGB-1 (HQ 510/84,  
852 AHF/Chroma) and SR101 (HQ 630/60, AHF), and a wa-  
853 ter immersion objective (CF175  $LWD \times 16/0.8W$ , DIC N2,  
854 Nikon, Germany). Image acquisition was performed with  
855 custom-made software (ScanM by M. Müller and T.E.) run-  
856 ning under IGOR Pro 6.3 for Windows (Wavemetrics), tak-  
857 ing time-lapsed  $64 \times 64$  pixel image scans ( $\approx (100\ \mu\text{m})^2$   
858 at 7.8125 Hz (Figure 1c). For simplicity, we refer to such  
859 a time-lapsed scan of a local population of GCL cells as

a “recording”. Despite the low frame rate, the  $\text{Ca}^{2+}$  re-  
sponses can be related to the spike rate (77–80). For doc-  
umenting the position of the recording fields, the retina un-  
der the microscope was oriented such that the most ventral  
edge pointed always towards the experimenter. In addition,  
higher resolution images ( $512 \times 512$  pixel) were acquired  
and recording field positions relative to the optic nerve were  
routinely logged.

**Data preprocessing.**  $\text{Ca}^{2+}$  traces were extracted for in-  
dividual ROIs as described previously (6, 20). Extracted  
traces  $\mathbf{c}_{raw}$  were then detrended to remove slow drifts in the  
recorded signal that were unrelated to changes in the neural  
response. First, a smoothed version of the traces,  $\mathbf{c}_{smooth}$ ,  
was calculated by applying a Savitzky-Golay filter of 3<sup>rd</sup>  
polynomial order and a window length of 60 s using the  
SciPy implementation `scipy.signal.savgol_filter`. This smoothed version was then subtracted from the  
raw traces to yield the detrended traces.

$$\mathbf{c}_{detrend} = \mathbf{c}_{raw} - \mathbf{c}_{smooth}$$

To make traces non-negative ( $\mathbf{c}_+$ ), we then clipped all  
values smaller than the 2.5<sup>th</sup> percentile,  $\eta_{2.5}$ , to that value,  
and then subtracted  $\eta_{2.5}$  from the detrended traces:

$$\mathbf{c}_+ = \mathbf{c}_{detrend} - \eta_{2.5}$$

This procedure (i.e. clipping to, and subtracting  $\eta_{2.5}$ ) was  
more robust than simply subtracting the minimum.

Finally, traces were then divided by the standard devi-  
ation within the time window before stimulus start at  $t_0$ :

$$\mathbf{c} := \mathbf{c}_{final} = \frac{\mathbf{c}_{nn}}{SD(\mathbf{c}_+; t_0)}$$

For training the model on movie response, we then es-  
timated firing rates  $\mathbf{r}$  from the detrended  $\text{Ca}^{2+}$  traces  $\mathbf{c}$  using  
the package C2S (<https://github.com/lucastheis/c2s>, Theis  
et al. (80)).

**Inclusion criteria.** We applied a sequence of quality filter-  
ing steps to recorded cells before analysis illustrated in Fig-  
ure 1-figure supplement 1Ic. As a first step, we applied a  
general response quality criterion, defined as a sufficiently  
reliable response to the Moving bar stimulus (as quantified  
by a quality index  $QI_{MB} > 0.6$ ), or a sufficiently reliable  
response to the chirp stimulus (as quantified by a quality  
index  $QI_{chirp} > 0.35$ ). The quality index is defined as in  
ref.(6):

$$QI = \frac{\text{Var}[\langle \mathbf{r} \rangle_i]_t}{\langle \text{Var}[\mathbf{r}]_t \rangle_i}$$

where  $\mathbf{r}$  is the T by I response matrix (time samples  
by stimulus repetitions) and  $\langle \rangle_x$  and  $\text{Var}[\ ]_x$  denote the mean  
and variance across the indicated dimension  $x$ , respectively.

The second and third step made sure only cells were  
included that were assigned to a ganglion cell group (i.e.,  
group index between 1 and 32) with sufficient confidence.

904 Confidence is defined as the probability assigned to the pre-  
905 dicted class by the random forest classifier (see (81)), and  
906 the threshold was set at  $\geq 0.25$ .

907 The fourth step made sure only cells with a sufficient  
908 model prediction performance, defined as an average single-  
909 trial test set correlation of  $\langle C(\hat{r}^{(n)}, r_i^{(n)}) \rangle_i > .3$ , were in-  
910 cluded.

911 All cells passing steps 1-3 were included in the horizon  
912 detection analysis (Figure 7); all cells passing steps 1-4 were  
913 included in the MEI analysis (Figure 3); the "red" cells pass-  
914 ing steps 1-4 were included in the MEI validation analysis  
915 (Figure 4). In the process of analysing MEIs, we fitted DoGs  
916 to their green and UV spatial component (see Methods sec-  
917 tion Concentric anisotropic 2D Difference-of-Gaussians fit).  
918 For the analysis of MEI properties (temporal frequency, cen-  
919 tre size, chromatic contrast), we only included cells with a  
920 sufficient DoG goodness-of-fit, determined as a value of the  
921 cost function of  $< .11$  for both green and UV on the re-  
922 sulting DoG fit. This threshold was determined by visual  
923 inspection of the DoG fits and led to the inclusion of 1613  
924 out of 1947 RGCs in the MEI property analysis.

925 **Visual stimulation.** For light stimulation (imaging ex-  
926 periments), we projected the image generated by a digi-  
927 tal light processing (DLP) projector (lightcrafter DPM-  
928 FE4500MKIIF, EKB Technologies Ltd) through the objec-  
929 tive onto the tissue. The lightcrafter featured a light-guide  
930 port to couple in external, band-pass filtered UV and green  
931 LEDs (light-emitting diodes) (green: 576 BP 10, F37-576;  
932 UV: 387 BP 11, F39-387; both AHF/Chroma) (82). To  
933 optimise spectral separation of mouse M- and S-opsins,  
934 LEDs were band-pass filtered (390/576 dual-band, F59-003,  
935 AHF/Chroma). LEDs were synchronised with the micro-  
936 scope's scan retrace. Stimulator intensity (as photoisomer-  
937 ization rate,  $10^3 P^*s^{-1}$  per cone) was calibrated to range  
938 from  $\approx 0.5$  (black image) to  $\approx 20$  for M- and S-opsins, re-  
939 spectively. Additionally, we estimated a steady illumina-  
940 tion component of  $\approx 10^4 P^*s^{-1}$  per cone to be present dur-  
941 ing the recordings because of two photon excitation of pho-  
942 topigments (74, 76). Before data acquisition, the retina was  
943 adapted to the light stimulation by presenting a binary noise  
944 stimulus ( $20 \times 15$  matrix,  $(40 \mu\text{m})^2$  pixels, balanced random  
945 sequence) at 5 Hz for 5 min to the tissue.

946 For electrophysiology experiments, stimuli were pre-  
947 sented using a digital projector (DPM-FE4500MKII, EKB  
948 Technologies Ltd) at a frame rate of 60 Hz and a spa-  
949 tial resolution of  $1140 \times 912$  pixels ( $1.3 \mu\text{m}$  per pixel)  
950 focused on the photoreceptor layer. Neutral density fil-  
951 ters (Thorlabs), a triple-band pass filter (405 BP 20,  
952 485 BP 20, 552 BP 16; 69000x, Chroma), and a cus-  
953 tom LED controller circuit were used to attenuate the  
954 light intensity of stimuli either to match that of the  $\text{Ca}^{2+}$   
955 imaging experiments (for MEI presentation) or to range  
956 from  $\approx 0$ -200  $P^*s^{-1}$  per rod (for cell identification).  
957 Stimuli were presented using Symphony software (<https://symphony-das.github.io/>) with custom extensions (<https://github.com/Schwartz-AlaLaurila-Labs/sa-labs-extension>).

960 **Identifying retinal ganglion cell types.** To functionally  
961 identify RGC groups in the  $\text{Ca}^{2+}$  imaging experiments, we  
962 used our default "fingerprinting" stimuli, as described ear-  
963 lier (6). These stimuli included a full-field ( $700 \mu\text{m}$  in diam-  
964 eter) chirp stimulus, and a  $300 \times 1,000 \mu\text{m}$  bright bar mov-  
965 ing at  $1,000 \mu\text{m} \cdot \text{s}^{-1}$  in eight directions across the recording  
966 field (with the shorter edge leading; Figure 1b).

967 The procedure and rationale for identifying cells in  
968 the electrophysiological recordings is presented in ref. (8).  
969 Cells with responses that qualitatively matched that of the  
970 OND and ON  $\alpha$  types were included in the study. Fol-  
971 lowing recording, cells were filled with AlexaFluor-488  
972 by patch pipette and imaged under a two-photon micro-  
973 scope. Dendrites were traced in Fiji (NIH) using the SNT  
974 plugin (83). Dendritic arbours were computationally flat-  
975 tened using a custom MATLAB tool (<https://doi.org/10.5281/zenodo.6578530>) based on the method in ref. (84) to  
976 further confirm their identity as morphological type 73 from  
977 ref. (9).  
978

979 **Mouse natural movies.** The natural movie stimulus con-  
980 sisted of clips of natural scenes recording outside in the  
981 field with a specialised, calibrated camera (5). This cam-  
982 era featured a fish-eye lens, and two spectral channels,  
983 UV (band-pass filter F37-424, AHF,  $> 90\%$  transmission  
984 at 350–419 nm) and green (F47-510,  $> 90\%$ , 470–550 nm,  
985 AHF), approximating the spectral sensitivities of mouse  
986 opsins (35). In mice, eye movements often serve to sta-  
987 bilise the image on the retina during head movements (48).  
988 Therefore, the camera was also stabilised by mounting it on  
989 a gimbal. As a result, the horizon bisected the camera's vi-  
990 sual field.

991 A mouse cam movie frame contained a circular field  
992 of view (FOV) of  $180^\circ$  corresponding to 437 pixels along  
993 the diameter. To minimise the influence of potential chro-  
994 matic and spatial aberrations introduced by the lenses, we  
995 focused on image cut-outs (crops;  $30^\circ \times 26^\circ$ , equivalent to  
996  $72 \times 64$  pixels in size) from upper and lower visual field,  
997 centred at  $[28^\circ, 56^\circ]$  and  $[-42^\circ, -31^\circ]$ , respectively, rela-  
998 tive to the horizon (for details, see (5)). Our stimulus movie  
999 consisted of 113 movie clips, each 150 frames (= 5 s) long.  
1000 108 clips were randomly reordered for each recording and  
1001 split into two 54 clips-long training sequences. The remain-  
1002 ing 5 clips formed a fixed test sequence that was presented  
1003 before, in between, and after the training sequences (Fig-  
1004 ure 1b). To keep intensity changes at clip transitions small,  
1005 we only used clips with mean intensities between 0.04 and  
1006 0.22 (for intensities in  $[0, 1]$ ). For display during the experi-  
1007 ments, intensities were then mapped to the range covered by  
1008 the stimulator, i.e.  $[0, 255]$ .

1009 **Convolutional neural network model of the retina.** We  
1010 trained a convolutional neural network (CNN) model to pre-  
1011 dict responses of RGCs to a dichromatic natural movie. The  
1012 CNN model consisted of two modules, a convolutional core  
1013 that was shared between all neurons, and a readout that was  
1014 specific for each neuron (85).

1015 The core module was modelled as a two-layer convolutional neural network with 16 feature channels in each layer. 1016 Both layers consisted of space-time separable 3D convolutional kernels followed by a batch normalisation layer and 1017 an ELU (exponential linear unit) nonlinearity. In the first 1018 layer, sixteen  $2 \times 11 \times 11 \times 21$  ( $c=\#$ input channels (green and UV)  $\times$   $h$ =height  $\times$   $w$ =width  $\times$   $t$ =#frames) kernels were 1019 applied as valid convolution; in the second layer, sixteen 1020  $16 \times 5 \times 5 \times 11$  kernels were applied with zero padding 1021 along the spatial dimensions. We parameterised the tempo- 1022 ral kernels as Fourier series and added one time stretching 1023 parameter per recording to account for inter-experimental 1024 variability affecting the speed of retinal processing. More 1025 precisely, every temporal kernel was represented by the first 1026  $k$  sine and cosine functions, with trainable weights and 1027 phases, on an evenly spaced temporal grid, where  $k = 7$  for 1028 the first layer, and  $k = 3$  for the second layer. Addition- 1029 ally, we introduced a trainable stretch parameter for every 1030 recording to account for faster and slower response kernels. 1031 For example, the first layer temporal kernels are 21 steps 1032 long. Then, in order to stay well under the Nyquist limit, 1033 we parameterise the kernels with  $k = 21/3 = 7$  sines and 1034 cosines.

1035 For each of those sines and cosines a weight  $(\alpha, \beta)$  is 1036 learned to represent the shape of the temporal responses kernel 1037 (shared among cells within a recording). Per scan  $i$ , the 1038 time grid  $t$  (21 steps from 0 to 1) is stretched by a factor  $\tau_i$  to 1039 account for different response speeds. To avoid adding addi- 1040 tional cycles (e.g., for stretch factors  $\tau > 1$ ) this is masked 1041 by an exponential envelope

$$1042 \epsilon(\tau) = \frac{1}{1 + \exp\left(-\left(t + \frac{21 \cdot 0.95}{\tau}\right)\right)} \quad (1)$$

1043 Thus,

$$1044 w_i = \sum_j^k \alpha_j \sin(2\pi \cdot \tau_i \cdot t \cdot \epsilon(\tau_i)) + \beta_j \cos(2\pi \cdot \tau_i \cdot t \cdot \epsilon(\tau_i)). \quad (2)$$

1045 is the temporal kernel parameterisation, that allows the 1046 model to learn a shared temporal filter that is made faster 1047 or slower for each specific scan (86).

1048 In the readout, we modelled each cell's spatial recep- 1049 tive field (RF) as a 2D isotropic Gaussian, parameterised as 1050  $\mathcal{N}(\mu_x, \mu_y; \sigma)$ . We then modelled the neural response as an 1051 affine function of the core feature maps weighted by the spa- 1052 tial RF, followed by a softplus nonlinearity.

1053 For the linearised version of the model, the architec- 1054 ture was exactly the same except for the fact that there was 1055 no ELU nonlinearity after both convolutional layers. The 1056 resulting CNN was therefore equivalent to an LN model.

1057 **Model training and evaluation.** We trained our network 1058 by minimising the Poisson loss

$$1059 \sum_{n=1}^N \left( \hat{r}^{(n)} - r^{(n)} \log \hat{r}^{(n)} \right)$$

1060 where  $N$  is the number of neurons,  $r^{(n)}$  is the mea- 1061 sured and  $\hat{r}^{(n)}$  the predicted firing rate of neuron  $n$  for an 1062 input of duration  $t=50$  frames. We followed the training 1063 schedule of Lurz et al. (87). Specifically, we used early stop- 1064 ping (88) on the correlation between predicted and measured 1065 neuronal responses on the validation set, which consisted of 1066 15 out of the 108 movie clips. If the correlation failed to 1067 increase during any 5 consecutive passes through the entire 1068 training set (epochs), we stopped the training and restored 1069 the model to the best performing model over the course of 1070 training. We went through 4 cycles of early stopping, restor- 1071 ing the model to the best performing, and continuing train- 1072 ing, each time reducing the initial learning rate of 0.01 by a 1073 learning rate decay factor of 0.3. Network parameters were 1074 iteratively optimised via stochastic gradient descent using 1075 the Adam optimiser (89) with a batch size of 32 and a chunk 1076 size (number of frames for each element in the batch) of 50. 1077 For all analyses and MEI generation, we used an ensemble 1078 of models as described in ref. (34). Briefly, we trained 5 in- 1079 stances of the same model initialised with different random 1080 seeds. Inputs to the ensemble model were passed to each 1081 member and the final ensemble model prediction was ob- 1082 tained by averaging the outputs of the 5 members. For ease 1083 of notation, we thus redefine  $\hat{r}^{(n)}$  to be the *ensemble* model 1084 prediction.

1085 After training, we evaluated model performance for 1086 each modelled neuron  $n$  as the correlation to the mean, i.e. 1087 the correlation between predicted response  $\hat{r}^{(n)}$  and mea- 1088 sured response  $r^{(n)}$  to the held-out test sequence, the latter 1089 averaged across 3 repetitions  $i = \{1, 2, 3\}$ :  $C(\hat{r}^{(n)}, \langle r_i^{(n)} \rangle_i)$ . 1090 Unlike the single-trial correlation  $C(\hat{r}^{(n)}, r_i^{(n)})$  which is al- 1091 ways limited to values  $< 1$  by inherent neuronal noise, a per- 1092 fect model can in theory achieve a value of 1 for the corre- 1093 lation to the mean, in the limit of infinitely many repetitions 1094 when the sample average  $\langle r_i^{(n)} \rangle_i$  is a perfect estimate of the 1095 true underlying response  $\rho^{(n)}$ . The observed correlation to 1096 the mean can thus be interpreted as an estimate of the frac- 1097 tion of the maximally achievable correlation achieved by our 1098 model. For deciding which cells to exclude from analysis, 1099 we used average single-trial correlation ( $\langle C(\hat{r}^{(n)}, r_i^{(n)}) \rangle_i$ ) 1100 since this measure reflects both model performance as well 1101 as reliability of the neuronal response to the movie stimulus 1102 for neuron  $n$  (see also Methods section on Inclusion crite- 1103 ria).

1104 **Synthesising MEIs.** We synthesised maximally exciting 1105 inputs for RGCs as described previously (32). Formally, for 1106 each model neuron  $n$  we wanted to find

$$1107 \mathbf{x}^{*(n)} = \arg \max_{\mathbf{x}} \langle \hat{r}^{(n)}(\mathbf{x})_{30:50} \rangle_t, \quad (3)$$

1108 i.e. the input  $\mathbf{x}^{*(n)}$  where the model neuron's re- 1109 sponse  $\langle \hat{r}(\mathbf{x})_{30:50} \rangle_t$ , averaged across frames 30 to 50, at- 1110 tains a maximum, subject to norm and range constraints 1111 (see below). To this end, we randomly initialised an input 1112  $\mathbf{x}_0^{(n)} \in \mathcal{R}^{c \times w \times h \times t}$  of duration  $t=50$  frames with Gaussian

1112 white noise, and then iteratively updated  $x_i^{(n)}$  according to  
 1113 the gradient of the model neuron's response:

$$\mathbf{x}_{i+1}^{(n)} = \mathbf{x}_i^{(n)} + \lambda \frac{\delta}{\delta \mathbf{x}_i^{(n)}} \langle \hat{\mathbf{r}}^{(n)}(\mathbf{x}_i^{(n)})_{30:50} \rangle_t, \quad (4)$$

1114 where  $\lambda = 10$  was the learning rate. The optimisation was  
 1115 performed using Stochastic Gradient Descent (SGD), and  
 1116 was subject to a norm and a range constraint. The norm con-  
 1117 straint was applied jointly across both channels and ensured  
 1118 that the L2 norm of each MEI did not exceed a fixed budget  
 1119  $b$  of 30. The norm-constrained MEI  $\tilde{\mathbf{x}}_i^{(n)}$  was calculated at  
 1120 each iteration as

$$\tilde{\mathbf{x}}_i^{(n)} = \frac{b}{\|\mathbf{x}_i^{(n)}\|_2} \times \mathbf{x}_i^{(n)} \quad (5)$$

1121 The range constraint was defined and applied for each  
 1122 colour channel separately and ensured that the range of the  
 1123 MEI values stayed within the range covered by the training  
 1124 movie. This was achieved by clipping values of the MEI ex-  
 1125 ceeding the range covered by the training movie to the min-  
 1126 imum or maximum value. Optimisation was run for at least  
 1127 100 iterations, and then stopped when the number of itera-  
 1128 tions reached 1,000, or when it had converged (whichever  
 1129 occurred first). Convergence was defined as 10 consecutive  
 1130 iterations with a change in model neuron activation of less  
 1131 than 0.001; model neuron activations ranged from  $\approx 1$  to  $\approx$   
 1132 10. We denote the resulting MEI for neuron  $n$  as  $\mathbf{x}^{*(n)}$ .

1133 **Analysing MEIs.** We analysed MEIs to quantify their spa-  
 1134 tial, temporal, and chromatic properties.

1135 **Spatial and temporal components of MEIs.** For each colour  
 1136 channel  $c$ , we decomposed the spatiotemporal MEIs into a  
 1137 spatial component and a temporal component by singular  
 1138 value decomposition:

$$U, S, V = \text{svd}(\mathbf{x}_c^{*(n)})$$

1139 with  $x_c^{*(n)} \in \mathcal{R}^{50 \times 288}$  for  $c \in [\text{green}, \text{UV}]$  is the  
 1140 MEI of neuron  $n$  in a given colour channel with its spatial  
 1141 dimension ( $18 \times 16 = 288$ ) flattened out. As a result, any  
 1142 spatiotemporal dependencies are removed and we only  
 1143 analyse spatial and temporal properties separately. The  
 1144 following procedures were carried out in the same manner  
 1145 for the green and the UV component of the MEI, and we  
 1146 drop the colour channel index  $c$  for ease of notation. The  
 1147 temporal component is then defined as the first left singular  
 1148 vector,  $U_{:,1}$ , and the spatial component is defined as the  
 1149 first right singular vector,  $V_{:,1}^T$ , reshaped to the original  
 1150 dimensions  $18 \times 16$ .

1152 **Concentric anisotropic 2D Difference-of-Gaussians fit.** We  
 1153 modelled the spatial component as concentric anisotropic  
 1154 Difference-of-Gaussians (DoG) using the nonlinear least-  
 1155 squares solver `scipy.optimize.least_squares`

1156 with soft-L1 loss function (40). The DoGs were parameter-  
 1157 ized by a location  $(\mu_x, \mu_y)$  shared between centre and sur-  
 1158 round, amplitudes  $A^c, A^s$ , variances  $(\sigma_x^c, \sigma_y^c), (\sigma_x^s, \sigma_y^s)$ , and  
 1159 rotation angles  $\theta^c, \theta^s$  separately for centre and surround:

$$\text{DoG} = G^c - G^s$$

1160 with

$$G^c(x, y) = A^c \exp(-f^c(x - \mu_x)^2 + 2g^c(y - \mu_y)(x - \mu_x) + h^c(y - \mu_y)^2)$$

1161 and

$$f^c = \frac{\cos^2 \theta^c}{2\sigma_x^c} + \frac{\sin^2 \theta^c}{2\sigma_y^c},$$

$$g^c = \frac{\sin 2\theta^c}{4\sigma_y^c} - \frac{\sin 2\theta^c}{4\sigma_x^c},$$

$$h^c = \frac{\sin^2 \theta^c}{2\sigma_x^c} + \frac{\cos^2 \theta^c}{2\sigma_y^c},$$

1162 and likewise for  $G^s$ . We initialised  $(\mu_x, \mu_y)$  in the fol-  
 1163 lowing way: Since we set the model readout's location pa-  
 1164 rameters to (0, 0) for all model neurons when generating  
 1165 their MEIs, we also expected the MEIs to be centred at (0,  
 1166 0), as well. Hence, we determined the location of the min-  
 1167 imum and the maximum value of the MEI; whichever was  
 1168 closer to the centre (0,0) provided the initial values for the  
 1169 parameters  $(\mu_x, \mu_y)$ . Starting from there, we then first fit  
 1170 a single Gaussian to the MEI, and took the resulting param-  
 1171 eters as initial parameters for the DoG fit. This was a con-  
 1172 strained optimisation problem, with lower and upper bounds  
 1173 on all parameters; in particular, such that the location param-  
 1174 eter would not exceed the canvas of the MEI, and such that  
 1175 the variance would be strictly positive.

1176 **MEI properties.**

1177 **Centre size** We defined the diameter of the centre of  
 1178 the MEI in the horizontal and the vertical orientation,  
 1179 respectively, as  $d_x^c = 2\sigma_x^c$  and  $d_y^c = 2\sigma_y^c$ . The centre size  
 1180 was calculated as  $\frac{1}{2}(d_x^c + d_y^c)$ . We then estimated a contour  
 1181 outlining the MEI centre as the line that is defined by all  
 1182 points at which the 2D centre Gaussian  $G^c$  attains the value  
 1183  $G^c(x, y)$  with  $(x, y) = (\mu_x + \sigma_x^c, \mu_y + \sigma_y^c)$ . The centre mask  
 1184  $m$  was then defined as a binary matrix with all pixels within  
 1185 the convex hull of this contour being 1 and all other pixels  
 1186 set to 0. This mask is used for calculating centre chromatic  
 1187 contrast (see below).

1189 **Temporal frequency** To estimate temporal frequency of  
 1190 the MEIs, we estimated the power spectrum of the temporal  
 1191 components using a Fast Fourier Transform after attenuating  
 1192 high frequency noise by filtering with a 5<sup>th</sup> order low-pass



1193 Butterworth filter with cutoff frequency 10 Hz. We then es-  
1194 timated the mean frequency of the temporal component by  
1195 calculating an average of the frequency components, each  
1196 weighted with its relative power.

1197 **Contrast** The contrast of the MEIs in the two channels,  
1198  $\gamma(\mathbf{x}_c^{*(n)})$  for  $c \in [\text{green}, \text{UV}]$ , was defined as the difference  
1199 between the mean value within the centre mask  $m$  at the two  
1200 last peaks of the temporal component of the MEI in the UV  
1201 channel at time points  $t_2$  and  $t_1$ :

$$\gamma(\mathbf{x}_c^{*(n)}) = (\mathbf{x}_c^{*(n)} \odot m)(t_2) - (\mathbf{x}_c^{*(n)} \odot m)(t_1),$$

1202 where  $\odot$  denotes the element-wise multiplication of the  
1203 MEI and the binary mask. (see Figure 3f). The peaks were  
1204 found with the function `scipy.signal.find_peaks`,  
1205 and the peaks found for the UV channel were used to calcu-  
1206 late contrast both in the green and the UV channel.

## 1207 Validating MEIs experimentally.

1208 **Generating MEI stimuli.** To test experimentally whether the  
1209 model correctly predicts which stimuli would maximally ex-  
1210 cite RGCs of different RGC groups, we performed a new set  
1211 of experiments (numbers indicated in red in Figure 1-figure  
1212 supplement 11c), where we complemented our stimulus set  
1213 with MEI stimuli. For the MEI stimuli, we selected 11  
1214 RGCs, chosen to span the responses space and to represent  
1215 both well-described and poorly understood RGC groups, for  
1216 which we generated MEIs at different positions on a  $5 \times 5$   
1217 grid (spanning  $110\mu\text{m}$  in vertical and horizontal direction).  
1218 We decomposed the MEIs as described above, and recon-  
1219 structed MEIs as rank 1 tensors by taking the outer product  
1220 of the spatial and temporal components:

$$\bar{\mathbf{x}}^* = S_{11}U_{:1} \otimes V_{:1}^T$$

1221 The MEI stimuli, lasting 50 frames (1.66 s) were  
1222 padded with 10 frames (.34 s) of inter-stimulus grey, and  
1223 were randomly interleaved. With 11 stimuli, presented at  
1224 25 positions and lasting 2 s each, the total stimulus duration  
1225 was  $11 \times 25 \times 2 \text{ s} = 550 \text{ s}$ . Since the model operated on a  
1226 z-scored (0 mean, 1 SD) version of the movie, MEIs as pre-  
1227 dicted by the model lived in the same space and had to be  
1228 transformed back to the stimulator range ([0, 255]) before  
1229 being used as stimuli in an experiment by scaling with the  
1230 movie's SD and adding the movie's mean. The MEIs' green  
1231 channel was then displayed with the green LED, and the UV  
1232 channel was displayed with the UV LED. For experiments at  
1233 Northwestern University, an additional transform was nec-  
1234 essary to achieve the same levels of photoreceptor activation  
1235 (photoisomerization rates) for M- and S-cones with different  
1236 LEDs. To ensure proper chromatic scaling between the dif-  
1237 ferent experimental apparatuses with different spectral pro-  
1238 files, we described the relative activation of M- and S-cones  
1239 by the green and UV LEDs in the stimulation setup used in  
1240 the two photon imaging experiments (setup A) by a matrix

$$\mathbf{A} = \begin{bmatrix} a_{mg} & a_{sg} \\ a_{mu} & a_{su} \end{bmatrix} = \begin{bmatrix} 1 & 0.19 \\ 0 & 1 \end{bmatrix},$$

1241 and the relative activation of M- and S-cones by  
1242 the stimulation setup used in the patch-clamp experiments  
1243 (setup B) by a matrix

$$\mathbf{B} = \begin{bmatrix} b_{mg} & b_{sg} \\ b_{mu} & b_{su} \end{bmatrix} = \begin{bmatrix} 1 & 0.9 \\ 0.035 & 1 \end{bmatrix},$$

1244 where diagonal entries describe the activation of M-  
1245 cones by the green LED, and of S-cones by the UV LED,  
1246 and entries in the off-diagonal describe the cross-activation  
1247 (i.e., M-cones by UV-LED and S-cones by green LED). The  
1248 activation of M-cones and S-cones  $\mathbf{e}^T = (e_m, e_s)$  by a stimu-  
1249 lus  $\mathbf{x} \in \mathcal{R}^{2 \times 1}$  displayed on a given stimulation setup was  
1250 approximated as  $\mathbf{e} = \mathbf{A}\mathbf{x}$  (90). Hence, a stimulus  $\mathbf{x}'$  dis-  
1251 played on setup B, defined as  $\mathbf{x}' = \mathbf{B}^{-1}\mathbf{A}\mathbf{x}$ , will achieve  
1252 the same photoreceptor activation as stimulus  $\mathbf{x}$  displayed  
1253 on setup A. Since the solution exceeded the valid range of  
1254 the stimulator ([0, 255]), we added an offset and multiplied  
1255 with a scalar factor to ensure all stimuli were within the valid  
1256 range.

1257 **Analysing RGC responses to MEI stimuli.** We wanted to  
1258 evaluate the responses of RGCs to the MEI stimuli in a spa-  
1259 tially resolved fashion, i.e. weighting responses to MEIs  
1260 displayed at different locations proportional to the strength  
1261 of the RGCs RF at that location. In order to be able to  
1262 meaningfully compare MEI responses between RGCs and  
1263 across groups, for each RGC, we first centred and scaled  
1264 the responses to zero mean and a standard deviation of 1.  
1265 Then, for each RGC  $n$ , we computed a spatial average of its  
1266 responses, weighting its responses at each spatial location  
1267  $(x, y)$  proportional to the Gaussian density  $\mathcal{N}_{\mu_n, \sigma_n}(x, y)$ ,  
1268 where the parameters of the Gaussian  $\mu_n = (\mu_x, \mu_y)$ ,  $\sigma_n$   
1269 were the model's estimated readout parameters for neuron  
1270  $n$  (Figure 4b,c,d left):

$$\langle \mathbf{r}^{(n)} \rangle_{x,y} = \sum_{x'=1}^5 \sum_{y'=1}^5 \mathbf{r}_{x',y'}^{(n)} \cdot \mathcal{N}_{\mu_n, \sigma_n}(x', y')$$

1271 where  $\mathbf{r}_{x',y'}^{(n)} \in \mathcal{R}^{11 \times 60}$  is the 60 frames (2 s) long re-  
1272 sponse of neuron  $n$  to an MEI at position  $(x, y) = (x', y')$ ,  
1273 resampled from the recording frame rate of 7.81 Hz to  
1274 30 Hz. We then averaged  $\langle \mathbf{r}^{(i)} \rangle_{x,y}$  across time in the op-  
1275 timisation time window, i.e. frames 30-50, to get a scalar  
1276 response  $\tilde{r}^{(n)} = \langle \mathbf{r}^{(n)} \rangle_{x,y,t}$  for each MEI stimulus (Fig-  
1277 ure 4d).

1278 **Selectivity index.** To quantify the selectivity of the response  
1279  $\tilde{r}^{(n)}(\mathbf{x}_i^*)$  of an RGC  $n$  to an MEI  $\mathbf{x}_i^*$ , we defined a selec-  
1280 tivity index as follows. First, we standardised the responses  
1281  $\tilde{r}^{(n)}$  across all MEIs by subtracting the mean and dividing  
1282 by the standard deviation. The selectivity index of RGC  
1283 group  $G_g$  to MEI  $\mathbf{x}_i^*$  was then defined as

$$SI_g(\mathbf{x}_i^*) = \langle \tilde{r}^{(n)}(\mathbf{x}_i^*) - \frac{1}{10} \sum_{j=1}^{11} \delta_{ij} \tilde{r}^{(n)}(\mathbf{x}_j^*) \rangle_n,$$

1284 where  $\delta_{ij}$  is the Kronecker delta. In words, the SI is the  
1285 difference (in units of SD response) between the response to  
1286 the MEI of interest ( $\mathbf{x}_i^*$ ) and the mean response to all other  
1287 (10) MEIs,  $\frac{1}{10} \sum_{j=1}^{11} \delta_{ij} \tilde{r}^{(n)}(\mathbf{x}_j^*)$ , averaged across all cells  
1288  $n$  belonging to the group of interest  $G_g$ .

1289 **Characterising nonlinear processing of chromatic**  
1290 **contrast space.** We wanted to analyse the tuning of  
1291  $G_{28}$ /tSbC RGCs to chromatic contrast and to this end, we  
1292 mapped the model response and its gradient across chromatic  
1293 contrast space (Figure 6). Specifically, the MEIs  
1294 have  $d = 2 \times 18 \times 16 \times 50 = 28,800$  pixels and dimensions,  
1295 14,400 for each colour channel. Now let  $x^{*(n)} \in \mathcal{R}^{1 \times 28800}$   
1296 be the cell's MEI estimated using the LN model, with the  
1297 first  $d=14,400$  dimensions defining the green pixels and the  
1298 remaining dimensions defining the UV pixels. Then for each  
1299 cell we consider a two-dimensional subspace spanned by  
1300 two basis vectors  $\mathbf{e}_1, \mathbf{e}_2$  where

$$\mathbf{e}_1 = \begin{bmatrix} x_1^{*(n)} \\ x_2^{*(n)} \\ \vdots \\ x_d^{*(n)} \\ 0 \\ \vdots \\ 0 \end{bmatrix} \quad \mathbf{e}_2 = \begin{bmatrix} 0 \\ \vdots \\ 0 \\ x_1^{*(n)} \\ x_2^{*(n)} \\ \vdots \\ x_d^{*(n)} \end{bmatrix}$$

1301 In words, the basis vectors consist of the UV compo-  
1302 nent of the MEI in the UV channel and 0s in the green  
1303 channel for  $\mathbf{e}_1$ , and of 0s in the UV channel and the UV  
1304 component of the MEI in the green channel for  $\mathbf{e}_2$ . We chose  
1305 this subspace due to its vicinity to the optimum of the neu-  
1306 ron's tuning curve, and we chose the UV MEI as compo-  
1307 nent of both basis vectors, since the green and UV compo-  
1308 nent of  $G_{28}$  MEIs were very similar except for their tem-  
1309 poral contrast (see Figure 3-figure supplement III). We then  
1310 sampled 11 points along each dimension, equally spaced be-  
1311 tween  $[-1, 1]$ , which resulted in stimuli that are identical in  
1312 terms of their spatial and temporal properties and only differ  
1313 in their contrast. We then evaluated the model neuron re-  
1314 sponse at these points in the subspace (Figure 6d). We also  
1315 evaluated the gradient of the model neuron response at these  
1316 points and plotted the direction of the gradient projected into  
1317 the subspace spanned by  $\mathbf{e}_1, \mathbf{e}_2$  (Figure 6b,c).

1318 **Detection performance analysis.** To test the perfor-  
1319 mance of individual RGCs of different groups in detecting  
1320 the target class of inter-clip transitions (ground-to-sky) from  
1321 all other classes of inter-clip transitions, we performed a  
1322 receiver operating characteristic (ROC) analysis (47). For  
1323 each RGC, we calculated its response to an inter-clip tran-  
1324 sition occurring at time  $t_0$  as the baseline-subtracted aver-  
1325 age response within 1 second following the transition, i.e.

1326  $\frac{1}{T} \sum_{t=0}^T r(t) - r(t_0)$ , with  $T=30$  frames at 30 Hz. For all  
1327  $n=40$  equally spaced thresholds within the response range of  
1328 a RGC, we then calculated the true positive rate (TPR) and  
1329 false positive rate (FPR) of a hypothetical classifier classi-  
1330 fying all transitions eliciting an above-threshold response as  
1331 a positive, and all other transitions as negative. Plotting the  
1332 TPR as a function of FPR yields an ROC curve, the area  
1333 under which (AUC) is equivalent to the probability that the  
1334 RGC will respond more strongly to a randomly chosen inter-  
1335 clip transition of the target class than to a randomly chosen  
1336 inter-clip transition of a different class. The AUC thus is a  
1337 measure of performance for RGCs in this detection task.

1338 **Detection task in simulation.** We simulated the four types  
1339 of transitions (sky-sky, sky-ground, ground-ground, ground-  
1340 sky) in natural scenes to include various visual context  
1341 changes across velocities, which could be triggered by dif-  
1342 ferent behaviours such as locomotion or eye movements.  
1343 With the simulated context-changing stimuli, we predicted  
1344 model neuron responses *in-silico* and then determined if  $G_{28}$   
1345 could perform the detection task robustly well across speeds.

1346 For generating the stimuli, 500 frames were randomly  
1347 extracted from the same mouse natural movies used for the  
1348 2P-imaging experiments. For each frame, we simulated vi-  
1349 sual transitions by moving a  $72 \times 64$  pixel-large window  
1350 along a fixed trajectory (Figure 7h bottom) at four different  
1351 angular velocities: 50, 150, 250, and  $350^\circ/\text{s}$ , correspond-  
1352 ing to 4, 12, 20, and 28 pixels per frame, respectively (Figure 6-  
1353 figure supplement 3VIIIa,b). Each edge of the trajectory is  
1354 220 pixels long, covering  $90.6^\circ$  of visual angle. Each se-  
1355 lected scene frame was sampled 8 times (that is, twice per  
1356 velocity). To avoid potential biases due to asymmetries in  
1357 the mouse natural movie, we sampled each frame for each  
1358 velocity both in clockwise and counterclockwise direction.  
1359 The stimuli were then down-sampled to  $18 \times 14$  pixels and  
1360 shown to the model at a frame rate of 30 Hz. Because the  
1361 trajectories contained different numbers of moving frames  
1362 for the 4 velocities, we “padded” the stimuli at the begin-  
1363 ning and the end of each transition stimulus by duplicating  
1364 the start and end frames, resulting in a total of 60 frames  
1365 each (see illustration in Figure 6-figure supplement 3VIIIb).

## 1366 Statistical analysis.

1367 **Permutation test.** We wanted to test how likely the differ-  
1368 ence in AUC observed for different RGC groups are to oc-  
1369 cur under the null hypothesis that the underlying distribu-  
1370 tions they are sampled from are equal. To this end, we per-  
1371 formed a permutation test. We generated a null distribution  
1372 for our test statistic, the absolute difference in AUC values  
1373  $\Delta\text{AUC}$ , by shuffling the RGC group labels of the two groups  
1374 of interest (e.g.  $G_{28}$  and  $G_{24}$ ) and calculating the test statis-  
1375 tic with shuffled labels 100,000 times. We only included  
1376 RGC groups with at least  $N=4$  cells in this analysis. We then  
1377 obtained a p-value for  $\Delta\text{AUC}$  observed with true labels as  
1378 the proportion of entries in the null distribution larger than  
1379  $\Delta\text{AUC}$ .

**Bootstrapped confidence intervals.** We bootstrapped confidence intervals for  $\Delta\text{AUC}$  (Figure 7 and Figure 6-figure supplement 2VII). For  $\Delta\text{AUC}$ , we generated a bootstrapped distribution by sampling 100 times with replacement from the AUC values of the two groups that were being compared and calculated  $\Delta\text{AUC}$ . We then estimated the 95 % confidence interval for  $\Delta\text{AUC}$  as the interval defined by the 2.5<sup>th</sup> and 97.5<sup>th</sup> percentile of the bootstrapped distribution of  $\Delta\text{AUC}$ .

For  $\Gamma(\phi_s, \phi_{\nu_g})$ , we generated a bootstrapped distribution by sampling 100 times with replacement from the MEI responses of RGC group  $g$  and then calculating  $\text{RDM}^{\phi_{\nu_g}}$  and  $\Gamma(\phi_s, \phi_{\nu_g})$  for each sample. We then estimated the 95 % confidence interval for  $\Gamma(\phi_s, \phi_{\nu_g})$  as the interval defined by the 2.5<sup>th</sup> and 97.5<sup>th</sup> percentile of the bootstrapped distribution of  $\Gamma(\phi_s, \phi_{\nu_g})$ .

**Estimating effect size.** The effect size of difference in AUC observed for different RGC groups  $l$  and  $k$ ,  $\Delta\text{AUC}$  (Figure 7 and Figure 6-figure supplement 2VII), was estimated as Cohen's  $d$  (91, 92):

$$\frac{|m_k - m_l|}{s},$$

with

$$s = \sqrt{\frac{(N_k - 1)s_k^2 + (N_l - 1)s_l^2}{N_k + N_l - 2}}$$

and  $m_k$  and  $s_k$  the sample mean and standard deviation, respectively, of the AUC observed for the  $N_k$  RGCs of group  $k$ .

**Estimating linear correlation.** Wherever the linear correlation between two paired samples  $x$  and  $y$  of size  $N$  was calculated (for evaluating model performance, Figure 2, Figure 1-figure supplement 1I, Figure 4-figure supplement 1IV, we used Pearson's correlation coefficient:

$$C_{xy} = \frac{\sum_i^N (x_i - \bar{x})(y_i - \bar{y})}{\sqrt{\sum_i^N (x_i - \bar{x})^2} \sqrt{\sum_i^N (y_i - \bar{y})^2}}$$

## Data availability

The data and the movie stimulus will be made available at <https://retinal-functomics.net> upon journal publication.

## Code availability

Custom analysis and model training code will be made available at <https://github.com/eulerlab> upon journal publication.

## Author contributions

**L. H.:** Conceptualisation, methodology, software, validation, formal analysis, data curation, writing (original draft),

visualisation **K. P. S.:** validation, investigation, data curation **C. B.:** methodology, software, formal analysis **Y. D.:** methodology, validation, visualisation, writing (review and editing) **Y. Q.:** resources, software **D. A. K.:** methodology, software, writing (review and editing) **Z. J.:** methodology, validation, investigation, visualisation, writing (original draft) **G. W. S.:** methodology, validation, investigation, writing (original draft), supervision, funding acquisition **M. B.:** conceptualisation, writing (review and editing), supervision, funding acquisition **P. B.:** conceptualisation, writing (review and editing), supervision, funding acquisition **K. F.:** conceptualisation, writing (review and editing), supervision, funding acquisition **A. S. E.:** conceptualisation, writing (review and editing), supervision, funding acquisition **T. E.:** conceptualisation, writing (original draft), visualisation, supervision, funding acquisition, project administration.

## ACKNOWLEDGEMENTS

We thank Jonathan Oesterle and Dominic Gonschorek for feedback on the manuscript, Jan Lause for statistical consulting, and Merle Harrer for general assistance. We also thank all members of the Sinz lab for regular discussions on the project. This work was supported by the German Research Foundation (DFG; CRC 1233 "Robust Vision: Inference Principles and Neural Mechanisms", project number 276693517 to P.B., M.B., T.E., K.F.; Heisenberg Professorship, BE5601/8-1 to P.B.; Excellence Cluster EXC 2064, project number 390727645 to P.B.; CRC 1456 "Mathematics of Experiment" project number 432680300 to A.S.E.), the Federal Ministry of Education and Research (FKZ 01IS18039A to P.B.), National Institutes of Health (NIH; NEI EY031029, NEI EY031329 to G.W.S.; NEI F30EY031565, NIGMS T32GM008152 to Z.J.), and the European Research Council (ERC) under the European Union's Horizon Europe research and innovation programme (A.S.E., grant agreement No. 101041669).

## Bibliography

1. J Y Lettvin, H R Maturana, W S McCulloch, and W H Pitts. What the Frog's Eye Tells the Frog's Brain. *Proceedings of the IRE*, 47(11):1940–1959, 1959.
2. Tom Baden, Thomas Euler, and Philipp Berens. Understanding the retinal basis of vision across species. *Nature Reviews Neuroscience*, 21(1):5–20, 2020. ISSN 14710048. doi: 10.1038/s41583-019-0242-1.
3. Maxwell H. Turner, Luis Gonzalo Sanchez Giraldo, Odella Schwartz, and Fred Rieke. Stimulus- and goal-oriented frameworks for understanding natural vision. *Nature Neuroscience*, 22(1):15–24, 2019. ISSN 15461726. doi: 10.1038/s41593-018-0284-0.
4. Eero P Simoncelli and Bruno A Olshausen. Natural Image Statistics and Neural Representation. *Annual Reviews Neurosciences*, 24:1193–1216, 2001.
5. Yongrong Qiu, Zhijian Zhao, David Klindt, Magdalena Kautzky, Klaudia P. Szatko, Frank Schaeffel, Katharina Rifai, Katrin Franke, Laura Busse, and Thomas Euler. Natural environment statistics in the upper and lower visual field are reflected in mouse retinal specializations. *Current Biology*, 31(15):3233–3247, 2021. ISSN 18790445. doi: 10.1016/j.cub.2021.05.017.
6. Tom Baden, Philipp Berens, Katrin Franke, Miroslav Román Rosón, Matthias Bethge, and Thomas Euler. The functional diversity of retinal ganglion cells in the mouse. *Nature*, 529(7586):345–350, 2016. ISSN 15206041. doi: 10.1038/nature16468.
7. Daniel Kerschensteiner. Feature Detection by Retinal Ganglion Cells. *Annual Review of Vision Science*, 8(1):1–35, 9 2022. ISSN 2374-4642. doi: 10.1146/annurev-vision-100419-112009.
8. Jillian Goetz, Zachary F. Jessen, Anne Jacobi, Adam Mani, Sam Cooler, Devon Greer, Sabah Kadri, Jeremy Segal, Karthik Shekhar, Joshua R. Sanes, and Gregory W. Schwartz. Unified classification of mouse retinal ganglion cells using function, morphology, and gene expression. *Cell Reports*, 40(2):111040, 7 2022. ISSN 22111247. doi: 10.1016/j.celrep.2022.111040.
9. J. Alexander Bae, Shang Mu, Jinseop S. Kim, Nicholas L. Turner, Ignacio Tartavull, Nico Kennitz, Chris S. Jordan, Alex D. Norton, William M. Silversmith, Rachel Prentki, Marissa Sorek, Celia David, Devon L. Jones, Doug Bland, Amy L.R. Sterling, Jungnam Park, Kevin L. Briggman, and H. Sebastian Seung. Digital Museum of Retinal Ganglion Cells with Dense Anatomy and Physiology. *Cell*, 173(5):1293–1306, 2018. ISSN 10974172. doi: 10.1016/j.cell.2018.04.040.
10. Bruce A. Rheume, Amyeo Jereen, Mohan Bolisetty, Muhammad S. Sajid, Yue Yang, Kathleen Renna, Lili Sun, Paul Robson, and Ephraim F. Trakhtenberg. Single cell transcriptome profiling of retinal ganglion cells identifies cellular subtypes. *Nature Communications*, 9(1), 2018. ISSN 20411723. doi: 10.1038/s41467-018-05134-3.
11. Emily M. Martersteck, Karla E. Hirokawa, Mariah Everts, Amy Bernard, Xin Duan, Yang Li, Lydia Ng, Seung W. Oh, Benjamin Ouellette, Joshua J. Royall, Michelle Stoecklin, Quanxin Wang, Hongkui Zeng, Joshua R. Sanes, and Julie A. Harris. Diverse Central Projection Patterns of Retinal Ganglion Cells. *Cell Reports*, 18(8):2058–2072, 2 2017. ISSN 22111247. doi: 10.1016/j.celrep.2017.01.075.

- 1492 12. Keith P Johnson, Michael J Fitzpatrick, Lei Zhao, Bing Wang, Sean McCracken, Philip R  
1493 Williams, and Daniel Kerschensteiner. Cell-type-specific binocular vision guides predation  
1494 in mice. *Neuron*, 3 2021. ISSN 0896-6273. doi: 10.1016/j.neuron.2021.03.010.
- 1495 13. Thomas A. Münch, Rava Azeredo Da Silveira, Sandra Siegert, Tim James Viney, Gau-  
1496 tam B. Awatramani, and Botond Roska. Approach sensitivity in the retina processed by  
1497 a multifunctional neural circuit. *Nature Neuroscience*, 12(10):1308–1316, 2009. ISSN  
1498 10976256. doi: 10.1038/nn.2389.
- 1499 14. Melis Yilmaz and Markus Meister. Rapid innate defensive responses of mice to looming  
1500 visual stimuli. *Current Biology*, 23(20):2011–2015, 2013. ISSN 09609822. doi: 10.1016/j.  
1501 cub.2013.08.015.
- 1502 15. T. Kim, N. Shen, J. C. Hsiang, K. P. Johnson, and D. Kerschensteiner. Dendritic and  
1503 parallel processing of visual threats in the retina control defensive responses. *Science  
1504 Advances*, 6(47):1–12, 2020. ISSN 23752548. doi: 10.1126/sciadv.abc9920.
- 1505 16. Gregory W. Schwartz and David Swygart. Circuits for Feature Selectivity in the Inner  
1506 Retina. In *The Senses: A Comprehensive Reference*, pages 275–292. Elsevier, 2020.  
1507 doi: 10.1016/b978-0-12-809324-5.24186-2.
- 1508 17. A. Szél, P. Röhlich, A. R. Caffé, B. Juliusson, G. Aguirre, and T. Van Veen. Unique  
1509 topographic separation of two spectral classes of cones in the mouse retina. *Journal  
1510 of Comparative Neurology*, 325(3):327–342, 1992. ISSN 0021-9967. doi: 10.1002/cne.  
1511 903250302.
- 1512 18. Maximilian Joesch and Markus Meister. A neuronal circuit for colour vision based on  
1513 rod-cone opponency. *Nature*, 532(7598):236–239, 2016. ISSN 14764687. doi: 10.1038/  
1514 nature17158.
- 1515 19. Tom Baden, Timm Schubert, Le Chang, Tao Wei, Mariana Zaichuk, Bernd Wissinger,  
1516 and Thomas Euler. A tale of two retinal domains: Near-Optimal sampling of achromatic  
1517 contrasts in natural scenes through asymmetric photoreceptor distribution. *Neuron*, 80(5):  
1518 1206–1217, 2013. ISSN 08966273. doi: 10.1016/j.neuron.2013.09.030.
- 1519 20. Klaudia P. Szatko, Maria M. Korympidou, Yanli Ran, Philipp Berens, Deniz Dalkara, Timm  
1520 Schubert, Thomas Euler, and Katrin Franke. Neural circuits in the mouse retina sup-  
1521 port color vision in the upper visual field. *Nature Communications*, 11(1), 2020. ISSN  
1522 20411723. doi: 10.1038/s41467-020-17113-8.
- 1523 21. Mohammad Hossein Khani and Tim Gollisch. Linear and nonlinear chromatic integration  
1524 in the mouse retina. *Nature Communications*, 12(1):1900, 12 2021. ISSN 2041-1723. doi:  
1525 10.1038/s41467-021-22042-1.
- 1526 22. Josh W. Moulard, Abigail Pienaar, Christopher Williams, Alex J. Watson, Robert J. Lucas,  
1527 and Timothy M. Brown. Extensive cone-dependent spectral opponency within a discrete  
1528 zone of the lateral geniculate nucleus supporting mouse color vision. *Current Biology*, 31  
1529 (15):3391–3400, 2021. ISSN 18790445. doi: 10.1016/j.cub.2021.05.024.
- 1530 23. Dimokratis Karamanlis and Tim Gollisch. Nonlinear spatial integration underlies the diver-  
1531 sity of retinal ganglion cell responses to natural images. *Journal of Neuroscience*, 41(15):  
1532 3479–3498, 4 2021. ISSN 15292401. doi: 10.1523/JNEUROSCI.3075-20.2021.
- 1533 24. Tatyana O. Sharpee. Computational identification of receptive fields. *Annual  
1534 Review of Neuroscience*, 36:103–120, 2013. ISSN 0147006X. doi: 10.1146/  
1535 annurev-neuro-062012-170253.
- 1536 25. Lane T. McIntosh, Niru Maheswaranathan, Aran Nayebi, Surya Ganguli, and Stephen A.  
1537 Baccus. Deep Learning Models of the Retinal Response to Natural Scenes. *Neural  
1538 Information Processing Systems (NIPS)*, (Nips):1–9, 2016. ISSN 1053-2498. doi:  
1539 10.1177/JCI44752.288.
- 1540 26. Niru Maheswaranathan, Lane T. McIntosh, Hidenori Tanaka, Satchel Grant, David B Kast-  
1541 ner, Joshua B Melander, Aran Nayebi, Luke E Brezovec, Julia H Wang, Surya Ganguli,  
1542 and Stephen A Baccus. Interpreting the retinal neural code for natural scenes: From  
1543 computations to neurons. *Neuron*, 111(17):2742–2755, 2023. ISSN 10974199. doi:  
1544 10.1016/j.neuron.2023.06.007.
- 1545 27. Hidenori Tanaka, Aran Nayebi, Niru Maheswaranathan, Lane T. McIntosh, Stephen A.  
1546 Baccus, and Surya Ganguli. From deep learning to mechanistic understanding in neuro-  
1547 science: the structure of retinal prediction. *Proceedings of the 33rd Conference on Neural  
1548 Information Processing Systems (NeurIPS 2019)*, (33):1–11, 2019.
- 1549 28. Eleanor Batty, Josh Merel, Nora Brackbill, Alexander Heitman, Alexander Sher, Alan Litke,  
1550 E. J. Chichilnisky, and Liam Paninski. Multilayer Recurrent Network Models of Primate  
1551 Retinal Ganglion Cell Responses. *Proceedings of the 5th International Conference on  
1552 Learning Representations*, (5), 2017.
- 1553 29. Daniel L.K. Yamins, Ha Hong, Charles F Cadieu, Ethan A Solomon, Darren Seibert,  
1554 and James J. DiCarlo. Performance-optimized hierarchical models predict neural re-  
1555 sponses in higher visual cortex. *Proceedings of the National Academy of Sciences  
1556 of the United States of America*, 111(23):8619–8624, 2014. ISSN 10916490. doi:  
1557 10.1073/pnas.1403112111.
- 1558 30. Santiago A Cadena, George H Denfield, Edgar Y Walker, Leon A Gatys, Andreas S Toli-  
1559 as, Matthias Bethge, and Alexander S Ecker. Deep convolutional models improve predictions  
1560 of macaque V1 responses to natural images. *PLoS Computational Biology*, 15(4):1–28,  
1561 2019. ISSN 15537358. doi: 10.1371/journal.pcbi.1006897.
- 1562 31. Ivan Ustyuzhaninov, Max F Burg, Santiago A Cadena, Jiakun Fu, Taliah Muhammad,  
1563 Kayla Ponder, Emmanouil Froudarakis, Zhiwei Ding, Matthias Bethge, Andreas S Toli-  
1564 as, and Alexander S Ecker. Digital twin reveals combinatorial code of non-linear computations  
1565 in the mouse primary visual cortex. *bioRxiv*, page 2022.02.10.479884, 2 2022. doi: 10.  
1566 1101/2022.02.10.479884.
- 1567 32. Edgar Y. Walker, Fabian H. Sinz, Erick Cobos, Taliah Muhammad, Emmanouil  
1568 Froudarakis, Paul G. Fahey, Alexander S. Ecker, Jacob Reimer, Xaq Pitkow, and An-  
1569 dreas S. Toliás. Inception loops discover what excites neurons most using deep predic-  
1570 tive models. *Nature Neuroscience*, 22(December), 2019. ISSN 15461726. doi:  
1571 10.1038/s41593-019-0517-x.
- 1572 33. Pouya Bashivan, Kohitij Kar, and James J. DiCarlo. Neural population control via deep im-  
1573 age synthesis. *Science*, 364(6439), 2019. ISSN 10959203. doi: 10.1126/science.aav9436.
- 1574 34. Katrin Franke, Konstantin F Willeke, Kayla Ponder, Mario Galdamez, Na Zhou, Taliah  
1575 Muhammad, Saumil Patel, Emmanouil Froudarakis, Jacob Reimer, Fabian H Sinz, and  
1576 Andreas S Toliás. State-dependent pupil dilation rapidly shifts visual feature selectivity.  
1577 *Nature*, 9 2022. ISSN 0028-0836. doi: 10.1038/s41586-022-05270-3.
- 1578 35. Gerald H. Jacobs, Gary A. Williams, and John A. Fenwick. Influence of cone pigment  
1579 coexpression on spectral sensitivity and color vision in the mouse. *Vision Research*, 44  
1580 (14):1615–1622, 2004. ISSN 00426989. doi: 10.1016/j.visres.2004.01.016.
- 1581 36. Adam Mani and Gregory W. Schwartz. Circuit Mechanisms of a Retinal Ganglion Cell  
1582 with Stimulus-Dependent Response Latency and Activation Beyond Its Dendrites. *Current  
1583 Biology*, 27(4):471–482, 2017. ISSN 09609822. doi: 10.1016/j.cub.2016.12.033.
- 1584 37. Nai Wen Tien, James T. Pearson, Charles R. Heller, Jay Demas, and Daniel Kerschen-  
1585 steiner. Genetically identified suppressed-by-contrast retinal ganglion cells reliably signal  
1586 self-generated visual stimuli. *Journal of Neuroscience*, 35(30):10815–10820, 2015. ISSN  
1587 15292401. doi: 10.1523/JNEUROSCI.1521-15.2015.
- 1588 38. Nai-Wen Tien, Carmela Vitale, Tudor C. Badea, and Daniel Kerschensteiner. Layer-  
1589 Specific Developmentally Precise Axon Targeting of Transient Suppressed-by-Contrast  
1590 Retinal Ganglion Cells (TSbC RGCs). *The Journal of Neuroscience*, 42(38):2332–21, 9  
1591 2022. ISSN 0270-6474. doi: 10.1523/jneurosci.2332-21.2022.
- 1592 39. Luca Abballe and Hiroki Asari. Natural image statistics for mouse vision. *PLoS ONE*, 17  
1593 (1):e0262763, 2022. doi: 10.1371/journal.pone.0262763.
- 1594 40. Divyansh Gupta, Wiktor Mlynarski, Olga Symonova, Jan Svaton, and Maximilian Joesch.  
1595 Panoramic visual statistics shape retina-wide organization of receptive fields. *bioRxiv*,  
1596 pages 1–31, 2022.
- 1597 41. E J Chichilnisky. A simple white noise analysis of neuronal light responses. *Network:  
1598 Computation in Neural Systems*, 12(2):199–213, 2001. ISSN 0954-898X. doi: 10.1080/  
1599 713663221.
- 1600 42. Konstantin F Willeke, Kelli Restivo, Katrin Franke, Arne F Nix, Santiago A Cadena, Tori  
1601 Shinn, Cate Nealley, Gabrielle Rodriguez, Saumil Patel, Alexander S Ecker, Fabian H  
1602 Sinz, and Andreas S Toliás. Deep learning-driven characterization of single cell tuning in  
1603 primate visual area V4 unveils topological organization. *bioRxiv*, 5 2023. doi: 10.1101/  
1604 2023.05.12.540591.
- 1605 43. Gregory William Schwartz. Chapter 16 - Color processing. In Gregory William Schwartz,  
1606 editor, *Retinal Computation*, pages 288–317. Academic Press, 2021. ISBN 978-0-12-  
1607 819896-4. doi: <https://doi.org/10.1016/B978-0-12-819896-4.00017-2>.
- 1608 44. Nai Wen Tien, Tahnbee Kim, and Daniel Kerschensteiner. Target-Specific Glycinergic  
1609 Transmission from VGlut3-Expressing Amacrine Cells Shapes Suppressive Contrast Res-  
1610 sponses in the Retina. *Cell Reports*, 15(7):1369–1375, 5 2016. ISSN 22111247. doi:  
1611 10.1016/j.celrep.2016.04.025.
- 1612 45. Jason Jacoby and Gregory William Schwartz. Typology and Circuitry of Suppressed-  
1613 by-Contrast Retinal Ganglion Cells. *Frontiers in Cellular Neuroscience*, 12(August):1–7,  
1614 2018. ISSN 16625102. doi: 10.3389/fncel.2018.00269.
- 1615 46. Brenna Krieger, Mu Qiao, David L. Rousso, Joshua R. Sanes, and Markus Meister. Four  
1616 alpha ganglion cell types in mouse retina: Function, structure, and molecular signatures.  
1617 *PLoS ONE*, 12(7):1–21, 2017. ISSN 19326203. doi: 10.1371/journal.pone.0180091.
- 1618 47. Tom Fawcett. An introduction to ROC analysis. *Pattern Recognition Letters*, 27(8):861–  
1619 874, 6 2006. ISSN 01678655. doi: 10.1016/j.patrec.2005.10.010.
- 1620 48. Arne F. Meyer, John O’Keefe, and Jasper Poort. Two Distinct Types of Eye-Head Coupling  
1621 in Freely Moving Mice. *Current Biology*, 30(11):2116–2130, 2020. ISSN 18790445. doi:  
1622 10.1016/j.cub.2020.04.042.
- 1623 49. Zhiwei Ding, Dat T Tran, Kayla Ponder, Erick Cobos, Zhuokun Ding, Paul G Fahey, Eric  
1624 Wang, Taliah Muhammad, Jiakun Fu, Santiago A Cadena, Stelios Papadopoulos, Saumil  
1625 Patel, Katrin Franke, Jacob Reimer, Fabian H Sinz, Alexander S Ecker, Xaq Pitkow, and  
1626 Andreas S Toliás. Bipartite invariance in mouse primary visual cortex. *bioRxiv*, 2023. doi:  
1627 10.1101/2023.03.15.532836.
- 1628 50. Santiago A Cadena, Marissa A Weis, Leon A Gatys, Matthias Bethge, and Alexan-  
1629 der S Ecker. Diverse Feature Visualizations Reveal Invariances in Early Layers of Deep  
1630 Neural Networks. In *Computer Vision - ECCV 2018*, pages 225–240. 2018. ISBN  
1631 9783030012571. doi: 10.1007/978-3-030-01258-8(\\_)\\_14.
- 1632 51. Matias A Goldin, Baptiste Lefebvre, Samuele Virgili, Mathieu Kim Pham Van Cang,  
1633 Alexander Ecker, Thierry Mora, Ulisse Ferrari, and Olivier Marre. Context-dependent  
1634 selectivity to natural images in the retina. *Nature Communications*, 13(1), 2022. ISSN  
1635 20411723. doi: 10.1038/s41467-022-33242-8.
- 1636 52. Peter Gouras and Bjorn Ekesten. Why do mice have ultra-violet vision? *Experimental Eye  
1637 Research*, 79(6):887–892, 12 2004. ISSN 00144835. doi: 10.1016/j.exer.2004.06.031.
- 1638 53. Le Chang, Tobias Breuninger, and Thomas Euler. Chromatic Coding from Cone-type  
1639 Unselective Circuits in the Mouse Retina. *Neuron*, 77(3):559–571, 2013. ISSN 08966273.  
1640 doi: 10.1016/j.neuron.2012.12.012.
- 1641 54. Maureen E. Stabio, Shai Sabbah, Lauren E. Quattrochi, Marissa C. Ildardi, P. Michelle  
1642 Ferguson, Megan L. Leyrer, Min Tae Kim, Inkyu Kim, Matthew Schiel, Jordan M. Renna,  
1643 Kevin L. Briggman, and David M. Berson. The M5 Cell: A Color-Opponent Intrinsically  
1644 Photosensitive Retinal Ganglion Cell. *Neuron*, 97(1):150–163, 2018. ISSN 10974199.  
1645 doi: 10.1016/j.neuron.2017.11.030.
- 1646 55. Takuma Sonoda, Yudai Okabe, and Tiffany M. Schmidt. Overlapping morphological and  
1647 functional properties between M4 and M5 intrinsically photosensitive retinal ganglion cells.  
1648 *Journal of Comparative Neurology*, 528(6):1028–1040, 4 2020. ISSN 10969861. doi:  
1649 10.1002/cne.24806.
- 1650 56. Lu Yin, Robert G. Smith, Peter Sterling, and David H. Brainard. Physiology and mor-  
1651 phology of color-opponent ganglion cells in a retina expressing a dual gradient of S and  
1652 M opsins. *Journal of Neuroscience*, 29(9):2706–2724, 3 2009. ISSN 02706474. doi:  
1653 10.1523/JNEUROSCI.5471-08.2009.
- 1654 57. C. R. Michael. Receptive fields of single optic nerve fibers in a mammal with an all-cone  
1655 retina. I: contrast-sensitive units. *Journal of neurophysiology*, 31(2):249–256, 1968. ISSN  
1656 00220377. doi: 10.1152/jn.1968.31.2.249.
- 1657 58. Dennis M. Dacey and Barry B. Lee. The ‘blue-on’ opponent pathway in primate retina  
1658 originates from a distinct bistratified ganglion cell type. *Nature*, 367(6465):731–735, 1994.  
1659 ISSN 00280836. doi: 10.1038/367731a0.
- 1660 59. Greg D. Field, Alexander Sher, Jeffrey L. Gauthier, Martin Greschner, Jonathon Shlens,  
1661 Alan M. Litke, and E. J. Chichilnisky. Spatial properties and functional organization of  
1662 small bistratified ganglion cells in primate retina. *Journal of Neuroscience*, 27(48):13261–  
1663 13272, 11 2007. ISSN 1523/JNEUROSCI.3437-07.2007.

- 1664 60. Christian Behrens, Timm Schubert, Silke Haverkamp, Thomas Euler, and Philipp Berens. 1749  
1665 Connectivity map of bipolar cells and photoreceptors in the mouse retina. *eLife*, 5 1750  
1666 (NOVEMBER2016):1–20, 2016. ISSN 2050084X. doi: 10.7554/eLife.20041. 1751
- 1667 61. Christopher M. Niell and Michael P. Stryker. Modulation of Visual Responses by Behavioral 1752  
1668 State in Mouse Visual Cortex. *Neuron*, 65(4):472–479, 2010. ISSN 08966273. doi: 1753  
1669 10.1016/j.neuron.2010.01.033. 1754
- 1670 62. Denise M. Piscopo, Rana N. El-Danaf, Andrew D. Huberman, and Christopher M. Niell. 1755  
1671 Diverse visual features encoded in mouse lateral geniculate nucleus. *Journal of Neuro-* 1756  
1672 *science*, 33(11):4642–4656, 3 2013. ISSN 02706474. doi: 10.1523/JNEUROSCI.5187-12. 1757  
1673 2013. 1758
- 1674 63. Shinya Ito, David A. Feldheim, and Alan M. Litke. Segregation of visual response proper- 1759  
1675 ties in the mouse superior colliculus and their modulation during locomotion. *Journal of* 1760  
1676 *Neuroscience*, 37(35):8428–8443, 8 2017. ISSN 15292401. doi: 10.1523/JNEUROSCI. 1761  
1677 3689-16.2017. 1762
- 1678 64. Richard H. Masland and Paul R. Martin. The unsolved mystery of vision. *Current Biology*, 17(15):R577–R582, 8 2007. ISSN 09609822. doi: 10.1016/j.cub.2007.05.040. 1763  
1679 1764
- 1680 65. Tom Baden, Frank Schaeffel, and Philipp Berens. Visual Neuroscience: A Retinal Gang- 1765  
1681 lion Cell to Report Image Focus? *Current Biology*, 27(4):R139–R141, 2 2017. ISSN 09609822. doi: 10.1016/j.cub.2016.12.022. 1766  
1682 1767
- 1683 66. Timothy J. Gawne and Thomas T. Norton. An opponent dual-detector spectral drive model 1768  
1684 of emmetropization. *Vision Research*, 173:7–20, 8 2020. ISSN 18785646. doi: 10.1016/j. 1769  
1685 visres.2020.03.011. 1770
- 1686 67. Dominic A. Evans, A. Vanessa Stempel, Ruben Vale, and Tiago Branco. Cognitive Control 1771  
1687 of Escape Behaviour. *Trends in Cognitive Sciences*, 23(4):334–348, 4 2019. ISSN 1879307X. doi: 10.1016/j.tics.2019.01.012. 1772  
1688 1773
- 1689 68. Y. Zhang, I.-J. Kim, J. R. Sanes, and M. Meister. The most numerous ganglion cell type of 1774  
1690 the mouse retina is a selective feature detector. *Proceedings of the National Academy of* 1775  
1691 *Sciences*, 109(36), 2012. ISSN 0027-8424. doi: 10.1073/pnas.1211547109. 1776
- 1692 69. Dimokratis Karamanlis, Helene Marianne Schreyer, and Tim Gollisch. Retinal Encoding 1777  
1693 of Natural Scenes. *Annual Review of Vision Science*, 8(1), 9 2022. ISSN 2374-4642. doi: 1778  
1694 10.1146/annurev-vision-100820-114239. 1779
- 1695 70. Samuel A. Ocko, Jack Lindsey, Surya Ganguli, and Stephane Deny. The emergence of 1780  
1696 multiple retinal cell types through efficient coding of natural movies. *bioRxiv*, (NeurIPS): 1781  
1697 458737, 2018. doi: 10.1101/458737. 1782
- 1698 71. Jack Lindsey, Samuel A. Ocko, Surya Ganguli, and Stephane Deny. A Unified Theory 1783  
1699 of Early Visual Representations from Retina to Cortex through Anatomically Constrained 1784  
1700 Deep CNNs. *International Conference on Learning Representations*, pages 1–17, 2019. 1785
- 1701 72. Tim Gollisch and Markus Meister. Eye Smarter than Scientists Believed: Neural Comput- 1786  
1702 ations in Circuits of the Retina. *Neuron*, 65(2):150–164, 2010. ISSN 08966273. doi: 1787  
1703 10.1016/j.neuron.2009.12.009. 1788
- 1704 73. Kevin L. Briggman and Thomas Euler. Bulk electroporation and population calcium imag- 1789  
1705 ing in the adult mammalian retina. *Journal of Neurophysiology*, 105(5):2601–2609, 2011. 1790  
1706 ISSN 00223077. doi: 10.1152/jn.00722.2010. 1791
- 1707 74. Thomas Euler, Susanne E Hausselet, David J Margolis, Tobias Breuninger, Xavier Castell, 1792  
1708 Peter B Detwiler, and Winfried Denk. Eyecup scope-optical recordings of light stimulus- 1793  
1709 evoked fluorescence signals in the retina. *PLoS Archiv European Journal of Physiology*, 457(6):1393–1414, 2009. ISSN 00316768. doi: 10.1007/s00424-008-0603-5. 1794  
1710 1795
- 1711 75. Wei Wei, Justin Elstrott, and Marla B. Feller. Two-photon targeted recording of GFP- 1796  
1712 expressing neurons for light responses and live-cell imaging in the mouse retina. *Nature* 1797  
1713 *Protocols*, 5(7):1347–1352, 7 2010. ISSN 17502799. doi: 10.1038/nprot.2010.106. 1798  
1714 1799
- 1715 76. Thomas Euler, Katrin Franke, and Tom Baden. Studying a Light Sensor with Light: Multi- 1800  
1716 photon Imaging in the Retina. In Espen Hartveit, editor, *Multiphoton Microscopy*, chap- 1801  
1717 ter 10, pages 225–250. Humana Press, 2019. ISBN 9781493997015. doi: 10.1002/ 1802  
1803 9781118696736.ch22. 1804
- 1718 77. Francesco Trapani, Giulia Spampinato, Pierre Yger, and Olivier Marre. Differences in 1805  
1719 nonlinearities determine retinal cell types. *Journal of Neurophysiology*, 130(3), 2023. doi: 1806  
1720 10.1152/jn.00243.2022. 1807
- 1721 78. Miroslav Román Rosón, Yannik Bauer, Ann H. Kotkat, Philipp Berens, Thomas Euler, 1808  
1722 and Laura Busse. Mouse dLGN Receives Functional Input from a Diverse Population of 1809  
1723 Retinal Ganglion Cells with Limited Convergence. *Neuron*, 102(2):462–476, 2019. ISSN 1810  
1724 10974199. doi: 10.1016/j.neuron.2019.01.040. 1811
- 1725 79. Philipp Berens, Jeremy Freeman, Thomas Deneux, Nicolay Chenkov, Thomas McColgan, 1812  
1726 Artur Speiser, Jakob H. Macke, Srinivas C. Turaga, Patrick Mineault, Peter Rupprecht, 1813  
1727 Stephan Gerhard, Rainer W. Friedrich, Johannes Friedrich, Liam Paninski, Marius Pachitariu, 1814  
1728 Kenneth D. Harris, Ben Bolte, Timothy A. Machado, Dario Ringach, Jasmine Stone, 1815  
1729 Luke E. Rogerson, Nicolas J. Sofroniew, Jacob Reimer, Emmanouil Froudarakis, Thomas 1816  
1730 Euler, Miroslav Román Rosón, Lucas Theis, Andreas S. Tolias, and Matthias Bethge. 1817  
1731 Community-based benchmarking improves spike rate inference from two-photon calcium 1818  
1732 imaging data. *PLoS Computational Biology*, 14(5):1–13, 2018. ISSN 15537358. doi: 1819  
1733 10.1371/journal.pcbi.1006157. 1820
- 1734 80. Lucas Theis, Philipp Berens, Emmanouil Froudarakis, Jacob Reimer, Miroslav 1821  
1735 Román Rosón, Tom Baden, Thomas Euler, Andreas S. Tolias, and Matthias Bethge. 1822  
1736 Benchmarking Spike Rate Inference in Population Calcium Imaging. *Neuron*, 90(3):471– 1823  
1737 482, 2016. ISSN 10974199. doi: 10.1016/j.neuron.2016.04.014. 1824  
1738 1825
- 1739 81. Yongrong Qiu, David A. Klindt, Klaudia P. Szatko, Dominic Gonschorek, Larissa Hoeffling, 1826  
1740 Timm Schubert, Laura Busse, Matthias Bethge, and Thomas Euler. Efficient coding of 1827  
1741 natural scenes improves neural system identification. *PLoS Computational Biology*, 19 1828  
1742 (4):e1011037, 4 2023. ISSN 1553-7358. doi: 10.1371/journal.pcbi.1011037. 1829  
1743 1830
- 1744 82. Katrin Franke, André Maia Chagas, Zhijian Zhao, Maxime J.Y. Zimmermann, Philipp 1831  
1745 Bartel, Yongrong Qiu, Klaudia P. Szatko, Tom Baden, and Thomas Euler. An arbitrary- 1832  
1746 spectrum spatial visual stimulator for vision research. *eLife*, 8, 9 2019. ISSN 2050084X. 1833  
1747 doi: 10.7554/eLife.48779. 1834
- 1748 83. Cameron Arshadi, Ulrik Günther, Mark Eddison, Kyle I.S. Harrington, and Tiago A. Fer- 1835  
1749 reira. SNT: a unifying toolbox for quantification of neuronal anatomy. *Nature Methods*, 18 1836  
1750 (4):374–377, 4 2021. ISSN 15487105. doi: 10.1038/s41592-021-01105-7. 1837
- 1838 84. Uygur Sümbül, Sen Song, Kyle McCulloch, Michael Becker, Bin Lin, Joshua R. Sanes, 1839  
1840 Richard H. Masland, and H. Sebastian Seung. A genetic and computational approach to 1841  
1842 structurally classify neuronal types. *Nature Communications*, 5, 2014. ISSN 20411723. 1843  
1844 doi: 10.1038/ncomms4512. 1845
- 1846 85. David A. Klindt, Alexander S. Ecker, Thomas Euler, and Matthias Bethge. Neural system 1847  
1848 identification for large populations separating “what” and “where”. *31st Conference on* 1849  
1850 *Neural Information Processing Systems*, (NIPS):4–6, 2017. ISSN 10495258. 1851
- 1852 86. Zhijian Zhao, David A. Klindt, André Maia Chagas, Klaudia P. Szatko, Luke Rogerson, 1853  
1854 Dario A. Protti, Christian Behrens, Deniz Dalkara, Timm Schubert, Matthias Bethge, Katrin 1855  
1856 Franke, Philipp Berens, Alexander S. Ecker, and Thomas Euler. The temporal structure 1857  
1858 of the inner retina at a single glance. *Scientific Reports*, 10(1):4399, 12 2020. ISSN 1859  
1860 2045-2322. doi: 10.1038/s41598-020-60214-z. 1861
- 1862 87. Konstantin-Klemens Lurz, Mohammad Bashiri, Konstantin Willeke, Akshay K Jagadish, 1863  
1864 Eric Wang, Edgar Y Walker, Santiago A Cadena, Taliah Muhammad, Erick Cobos, And- 1865  
1866 reas S Tolias, Alexander S Ecker, and Fabian H Sinz. Generalization in data-driven mod- 1866  
1867 els of primary visual cortex. *Proceedings of the 9th International Conference on Learning* 1868  
1869 *Representations*, (9), 2021. 1869
- 1870 88. Lutz Prechelt. Early stopping - But when? In *Neural Networks:Tricks of the Trade. Lecture* 1871  
1872 *Notes in Computer Science*, volume 1524, pages 55–69. 1998. ISBN 9783642352881. 1873  
1874 doi: 10.1007/978-3-642-35289-8(\\_)\\_5. 1875
- 1876 89. Diederik P. Kingma and Jimmy Ba. Adam: A Method for Stochastic Optimization. *Proceed-* 1876  
1877 *ings of the 3rd International Conference on Learning Representations*, (3):1–15, 2015. 1878  
1879 ISSN 09252312. doi: http://doi.acm.org.ezproxy.lib.ucf.edu/10.1145/1830483.1830503. 1880
- 1881 90. Matthias P. Christenson, S. Navid Mousavi, Elie Oriol, Sarah L. Heath, and Rudy Behnia. 1881  
1882 Exploiting colour space geometry for visual stimulus design across animals. *Philosophical* 1882  
1883 *Transactions of the Royal Society B: Biological Sciences*, 377(1862), 10 2022. ISSN 1884  
1885 14712970. doi: 10.1098/rstb.2021.0280. 1886
- 1887 91. Jacob Cohen. *Statistical Power Analysis for the Behavioral Sciences*. Routledge, 5 1988. 1887  
1888 doi: 10.4324/9780203771587. 1889
- 1890 92. Jean-Christophe Goulet-Pelletier and Denis Cousineau. A review of effect sizes and their 1890  
1891 confidence intervals, Part I: The Cohen’s d family. *The Quantitative Methods for Psychol-* 1891  
1892 *ogy*, 14(4):242–265, 12 2018. ISSN 2292-1354. doi: 10.20982/tqmp.14.4.p242. 1892

1781 **Supplementary information**

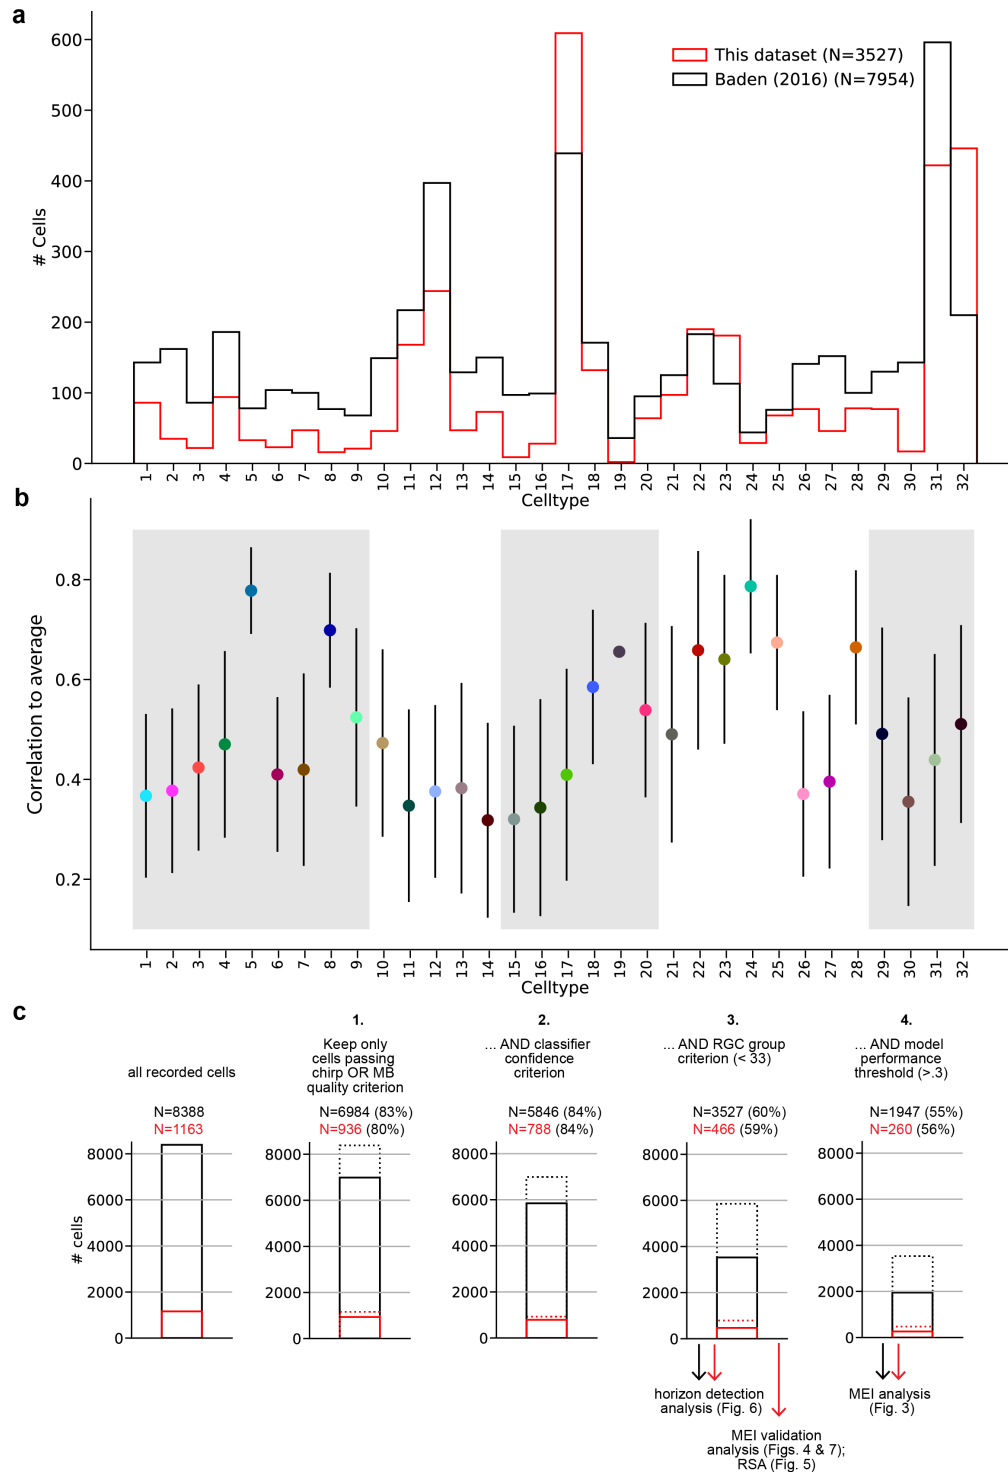

**Figure I 1-figure supplement 1.** (a) Distribution across cell types for this dataset, and for the dataset described in Baden et al. (6) which was the basis for our classifier (81). (b) Mean  $\pm$  SD of model performance, evaluated as correlation between model prediction and RGC response on the 25 s long test sequence, averaged across 3 repetitions of the test sequence, for each cell type. (c) Response quality, RGC group assignment and model performance filtering pipeline showing the consecutive steps and the fraction of cells remaining after each step. Black bars and numbers indicate cells from all experiments (i.e. all RGCs for which we recorded chrip, MB, and movie responses), red bars and numbers indicate the subset of cells recorded in the MEI validation experiments (i.e. those RGCs for which we *additionally* recorded MEI stimuli responses). Dotted bars indicate the number of cells before the current filtering step. The filtering steps were as follows: **1.** Keep only cells that pass the chrip OR MB quality criterion ( $QI_{MB} > .6$  OR  $QI_{chrip} > .35$ ). **2.** Keep only cells that the classifier assigns to a group with confidence  $\geq .25$ . **3.** Keep only cells assigned to a ganglion cell group (groups 1-32; groups 33-46 are amacrine cell groups); **4.** Keep only cells with sufficiently high model performance ( $\langle C(\hat{r}^{(n)}, r_i^{(n)}) \rangle_i > .3$ ). All cells passing steps 1-3 were included in the horizon detection analysis (Figure 7); all cells passing steps 1-4 were included in the MEI analysis (Figure 3); the "red" cells passing steps 1-4 were included in the MEI validation analysis (Figure 4). All quality criteria are described in the Methods section.

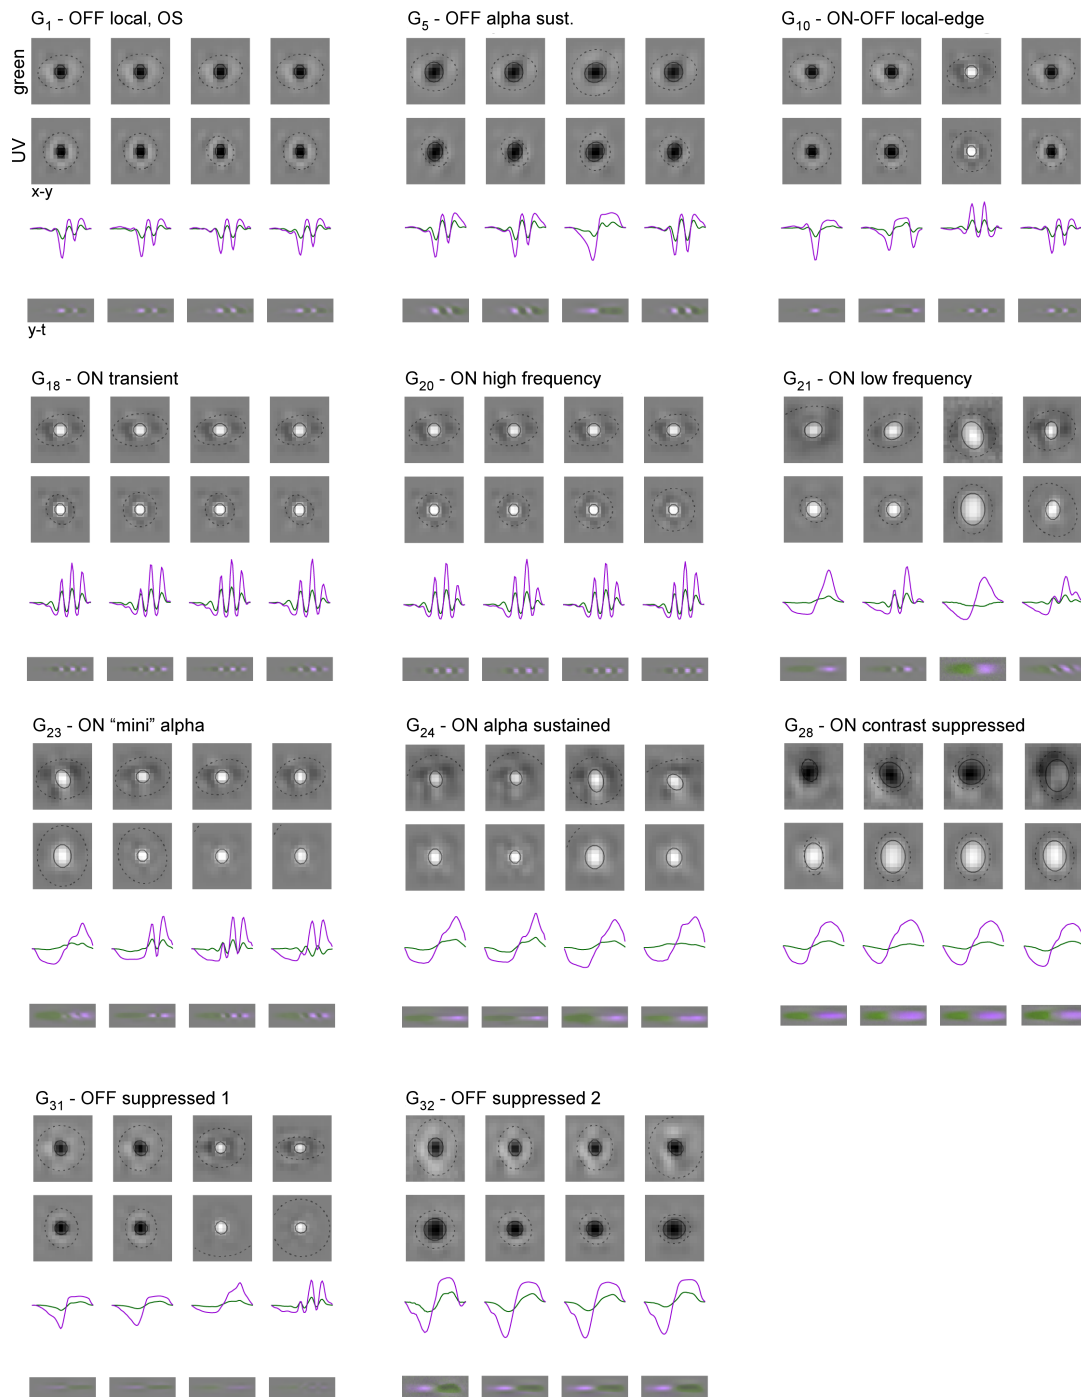

Figure II 3-figure supplement 1. Example MEIs for example cell types. Rows in each panel as in Figure 4a.

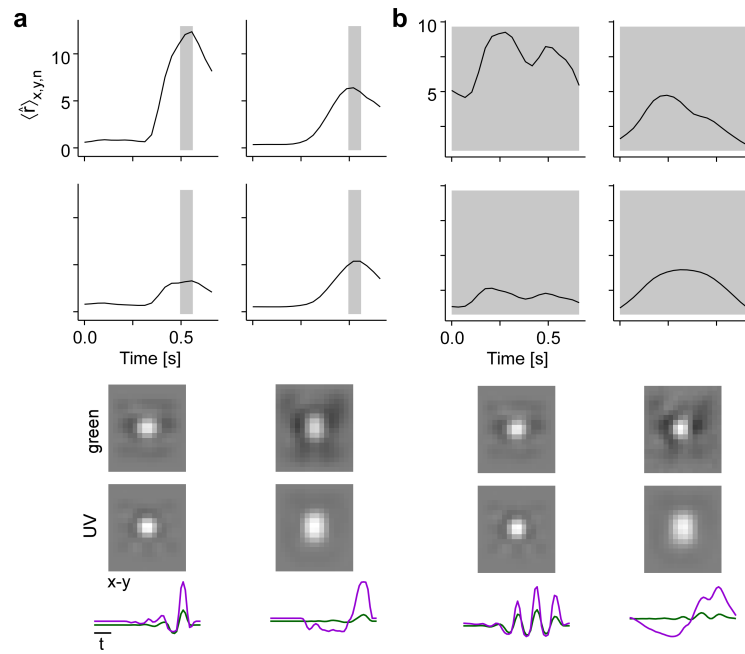

**Figure III 3-figure supplement 2.** Illustration of how different time windows for optimisation affect MEI temporal properties. **(a)** MEIs (bottom panels) and model neuron responses (top panels) for a short optimisation window of 2 frames ( $\approx .066$  s, indicated by grey shaded area). The top row shows the responses of a more transient RGC to its own MEI (left stimulus) and to the MEI of a more sustained RGC (right stimulus). The bottom row shows the responses of the more sustained RGC to its own MEI (right stimulus) and to the MEI of the more transient RGC (left stimulus). **(b)** MEIs (bottom panels) and model neuron responses (top panels) for a longer optimisation window of 20 frames ( $\approx .66$  s, indicated by grey shaded area) as used throughout the paper. The top row shows the responses of a more transient RGC to its own MEI (left stimulus) and to the MEI of a more sustained RGC (right stimulus). The bottom row shows the responses of the more sustained RGC to its own MEI (right stimulus) and to the MEI of the more transient RGC (left stimulus). Same cells as in (a).



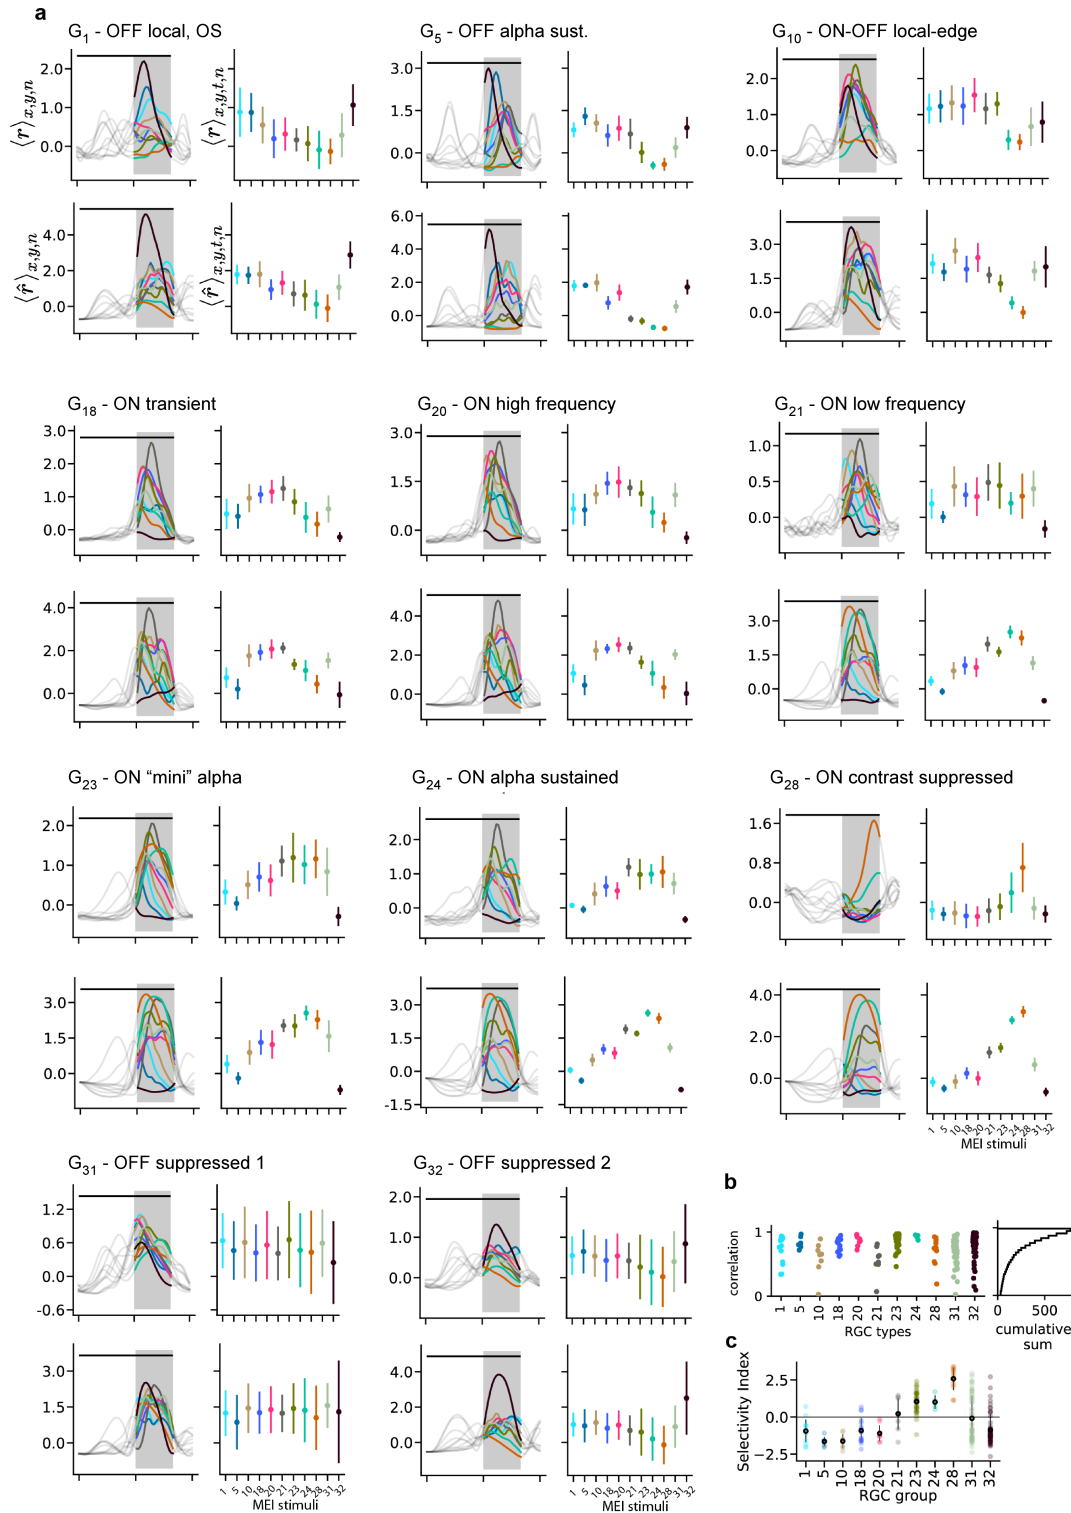

**Figure IV 4-figure supplement 1.** (a) Recorded (top,  $r$ ) and predicted (bottom,  $\hat{r}$ ) responses to the 11 different MEIs for all example cell types. Left: responses are averaged across the indicated dimensions  $x, y, n$ : different MEI locations ( $x, y$ ) and RGCs in a group ( $n$ ); black bar indicates stimulus duration (from 0 to 1.66 s), grey rectangle marks optimisation time window (from 1 to 1.66 s). Right: Responses to different MEIs, additionally averaged across time ( $t$ ) within the optimisation time window. Error bars indicated SD across cells. (b) Correlation between the measured and predicted response magnitudes to the MEI stimuli per example cell type. Cumulative histogram is across all  $N=788$  cells; 50% of cells have a correlation between measured and predicted response magnitude of  $\geq 0.8$ . (c) Mean  $\pm$  SD of selectivity index (see Methods) for the example cell groups, indicating the difference in response to MEI 28 vs. the average response to all other MEIs in units of standard deviation of the response.

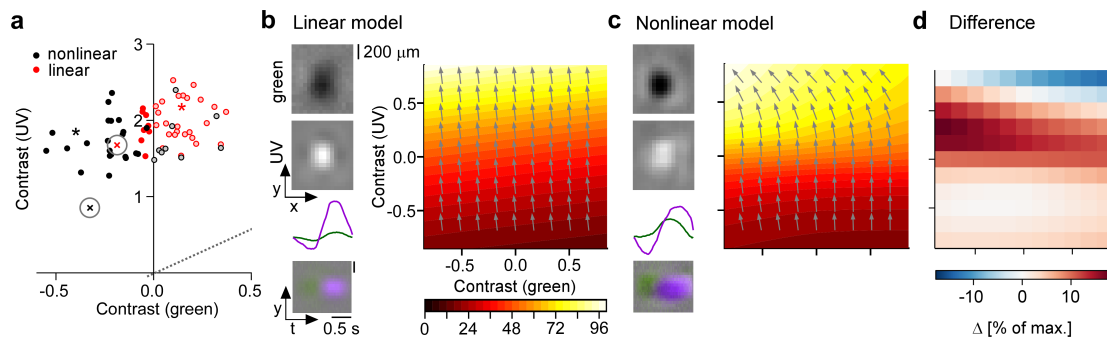

**Figure V 5-figure supplement 1.** (a) Distribution of green and UV MEI centre contrast for a linear-nonlinear (LN) model (red) and a CNN model (black); from Figure 6a. (b,c) Left: MEIs for a second example cell of RGC group  $G_{28}$ , generated with the LN model (b) or the CNN model (c). The cell's MEI centre contrast for both models is marked in (a) by cross. Right: Respective tuning maps of example neuron in chromatic contrast space. Colours represent responses in % of maximum response; arrows indicate the direction of the gradient across chromatic contrast space. (d) Difference in response between LN and CNN model (in % of maximum response).

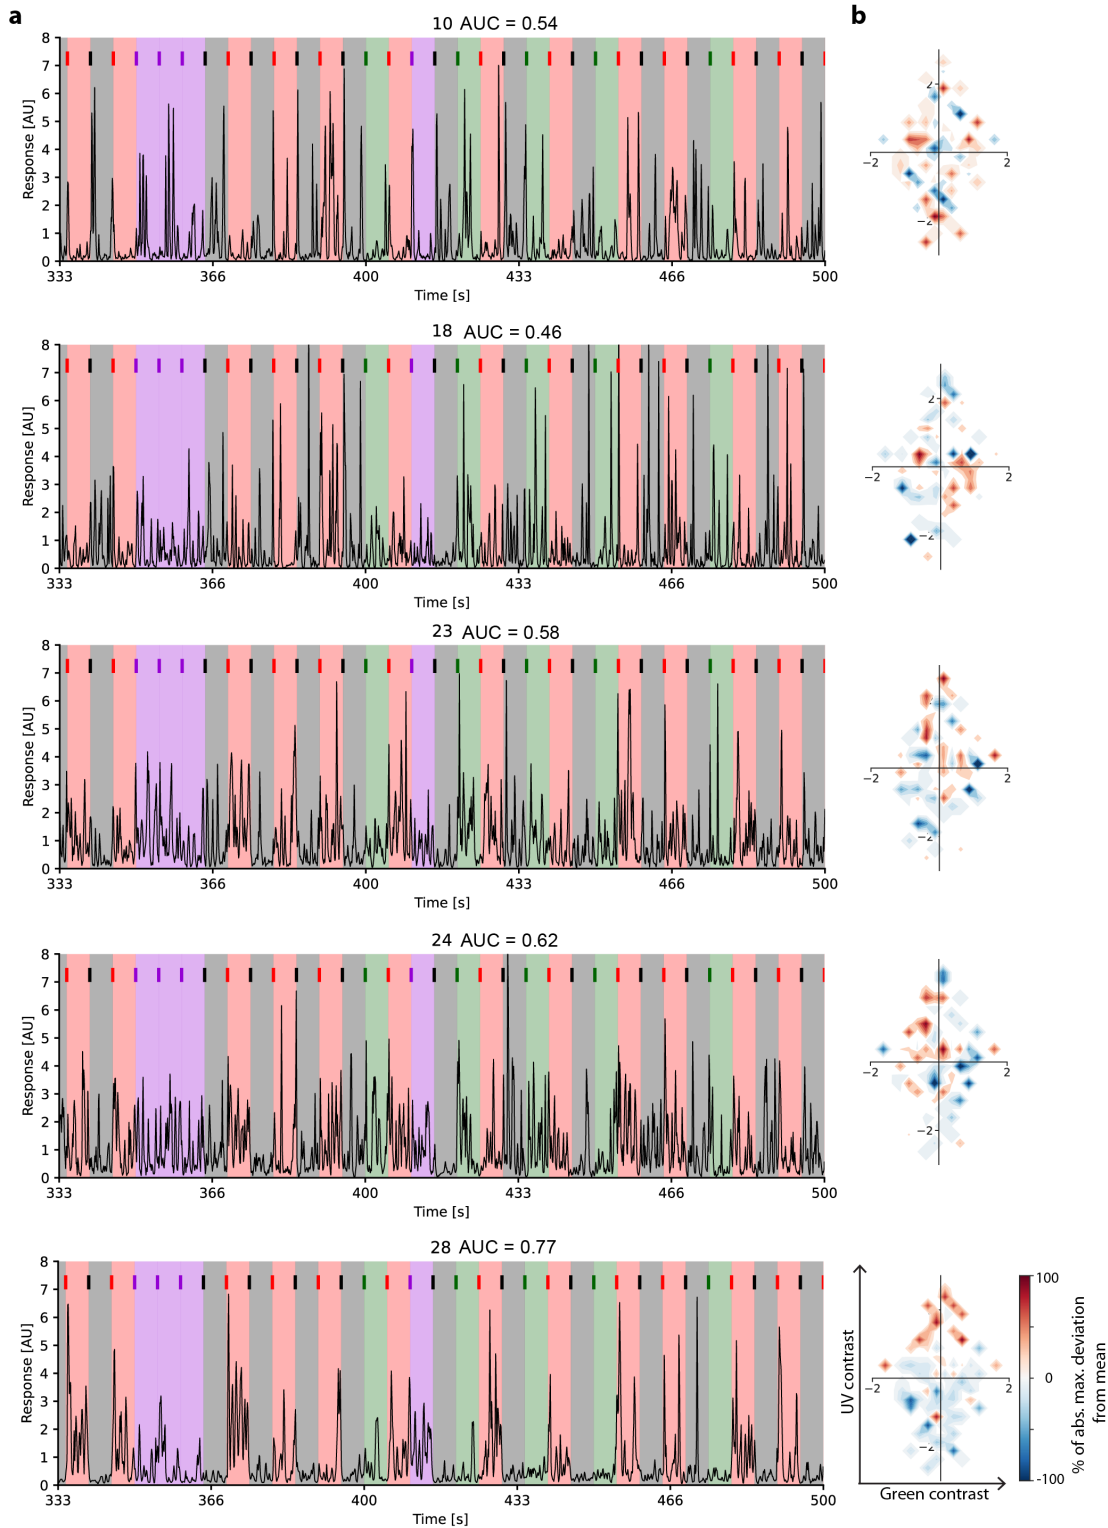

**Figure VI 6-figure supplement 1. (a)** Traces of example cells of different cell groups ( $G_{10}$ ,  $G_{18}$ ,  $G_{23}$ ,  $G_{24}$ ,  $G_{28}$ ) from a single recording field, responding to 33 (of 122) inter-clip transitions. Inter-clip transitions are colour-coded by transition type (red: ground-to-sky, purple: sky-to-sky, green: ground-to-ground, black: sky-to-ground). **(b)** The resulting tuning maps in chromatic contrast space.

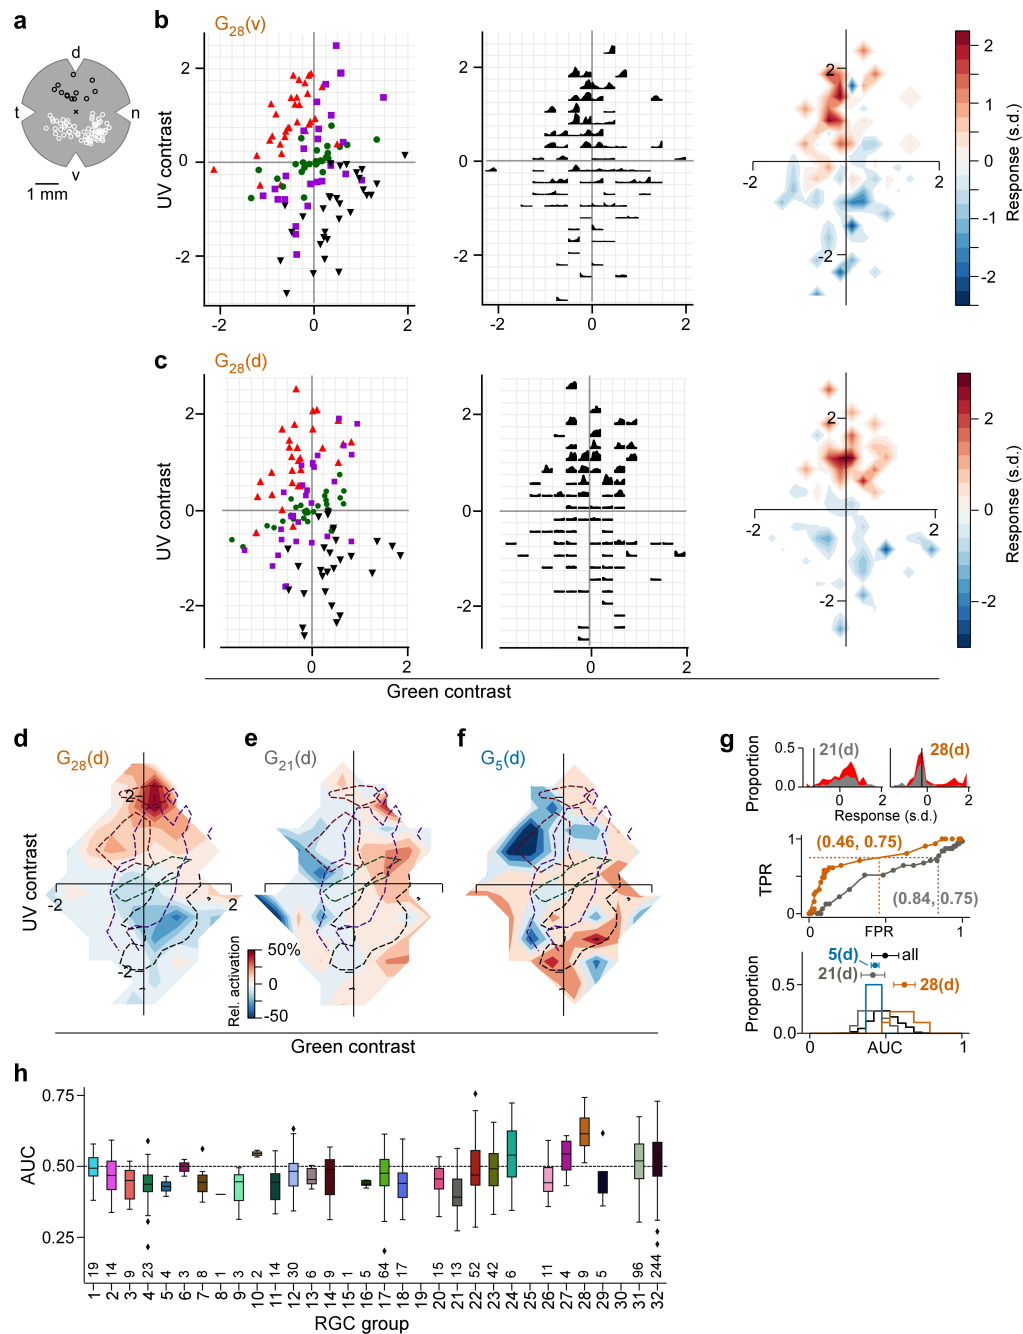

**Figure VII 6-figure supplement 2.** (a) Illustration of a flat-mounted retina, with recording fields in the dorsal (black circles) and ventral (white circles) retina (cross marks optic disc; d, dorsal; v, ventral; t, temporal; n, nasal). (b) *Left*: Distribution of green and UV contrasts of  $N=122$  inter-clip transitions seen by a ventral group 28 ( $G_{28}$ ) RGC, coloured by transition type (red triangle, ground-to-sky; green disk, ground-to-ground; black downward triangle, sky-to-ground; purple square, sky-to-sky). *Middle*: Responses of example RGC in the 1 s following an inter-clip transition, averaged across transitions within the bins indicated by the grid. *Right*: Responses transformed into a tuning map by averaging within bins as defined by grid (*Left*. Responses are z-scored ( $\mu = 0$ ,  $\sigma = 1$ )). (c) Like (b) but for a dorsal  $G_{28}$  RGC. (d) Tuning map of  $N=9$  dorsal  $G_{28}$  RGCs, created by averaging the tuning maps of the individual RGCs. (e) Same as (d) for  $N=13$   $G_{21}$  RGCs. (f) Same as (d) for  $N=4$   $G_5$  RGCs. (g) *Top*: Illustration of ROC analysis for two dorsal RGCs, a  $G_{21}$  (left) and a  $G_{28}$  (right). For each RGC, responses were binned to all inter-clip transitions, separately for ground-to-sky (red) and all other transitions (grey). *Middle*: Sliding a threshold  $d$  across the response range, classifying all transitions with response  $> d$  as ground-to-sky, and registering the false-positive-rate (FPR) and true-positive-rate (TPR) for each threshold yields an ROC curve (middle). Numbers in brackets indicate (FPR, TPR) at the threshold indicated by black vertical line in histogram plots. *Bottom*: We evaluated performance for each cell as the area under the ROC curve (AUC), and plotted the distribution across AUC values for all cells (black), for  $G_5$  (blue), for  $G_{21}$  (grey), and for  $G_{28}$  (orange). Among the dorsal RGCs,  $G_{28}$  RGCs achieved the highest AUC on average (mean  $\pm$  SD AUC,  $G_{28}$  ( $N=9$  cells):  $0.62 \pm 0.07$ ; all other groups ( $N=720$ ):  $0.49 \pm 0.09$ ,  $\Delta AUC = 0.13$ , bootstrapped 95% confidence interval  $CI_{95} = [0.08, 0.18]$ , Cohen's  $d = 1.45$ , two-sample permutation test  $G_{28}$  vs. all other groups (see Methods):  $p = 0$  with 100,000 permutations; next-best performing  $G_{24}$  ( $N=6$ ):  $0.54 \pm 0.12$ ,  $\Delta AUC = 0.08$ , bootstrapped 95% confidence interval  $CI_{95} = [0.01, 0.18]$ , Cohen's  $d = 0.87$ ; two-sided  $t$ -test  $G_{28}$  vs.  $G_{24}$ :  $p = .15$  with 100,000 permutations (not significant)). AUC mean  $\pm$  SD indicated as dots and horizontal lines above histograms. (h) Boxplot of AUC distributions per cell type (dorsal). The box extends from the first quartile ( $Q_1$ ) to the third quartile ( $Q_3$ ) of the data; the line within a box indicates the median. The whiskers extend to the most extreme points still within  $[Q_1 - 1.5 \times IQR, Q_3 + 1.5 \times IQR]$ ,  $IQR = \text{inter-quartile range}$ . Diamonds indicate points outside this range. All elements of the plot (upper and lower boundaries of the box, median line, whiskers, diamonds) correspond to actual observations in the data. Numbers of RGCs for each type are indicated in the plot.

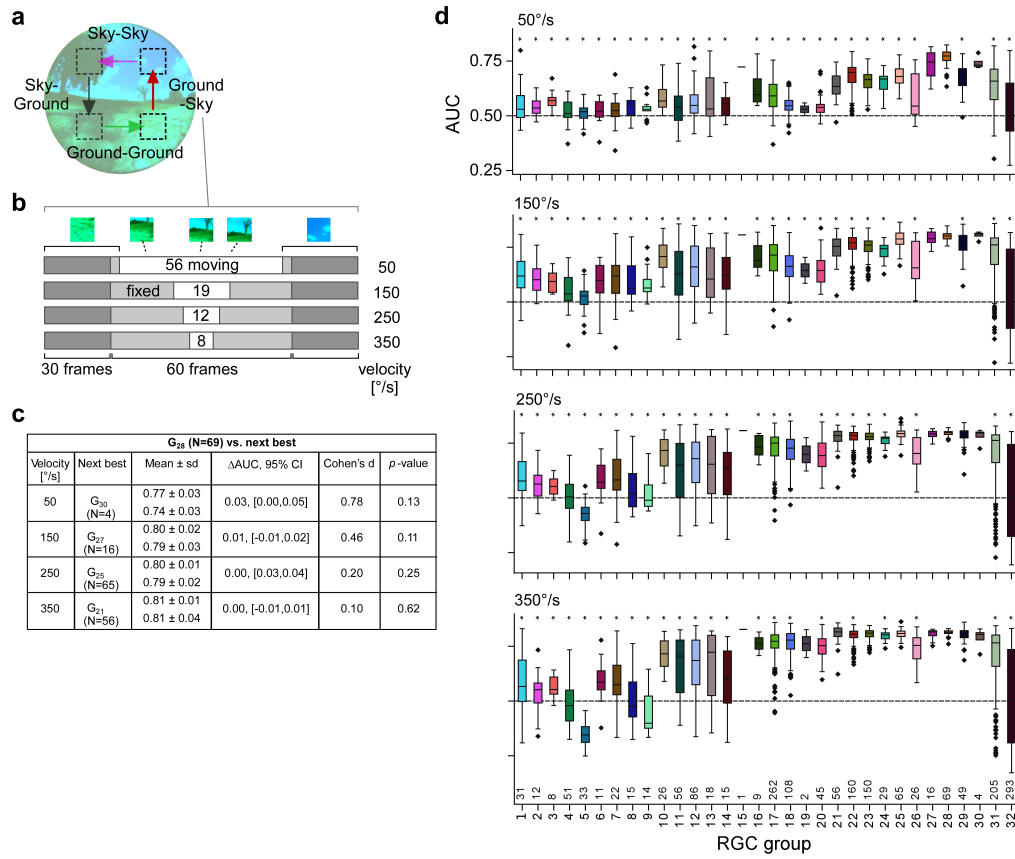

**Figure VIII 6-figure supplement 3. (a)** Illustration transition stimulus paradigm (from Figure 7h). **(b)** Structure of stimuli for different velocities, using a ground-to-sky transition as an example. **(c)** Statistics of the area under the ROC curve (AUC) for the sky-ground detection task in the simulation for different velocities (G<sub>28</sub> vs. the next-best RGC group). Columns (from *left*): mean ± standard deviation of AUC values (top: G<sub>28</sub>; bottom: the respective best next RGC type); difference in mean AUC and corresponding bootstrapped 95% confidence intervals; Cohen's d and p-value of a two-sample permutation test with 100,000 repeats. **(d)** Boxplots of AUC distributions per cell type for the different velocities (plots like in Figure 7g,j).
